# Supplementary material for: The Genome of Spironucleus salmonicida Highlights a Fish Pathogen Adapted to Fluctuating Environments
Source: PubMed Central journal article supplement (PMC3916229; doi:10.1371/journal.pgen.1004053), 2014-02-06
Supplement: pgen.1004053.s002.pdf [file pgen.1004053.s002.pdf]

|                |                                                                |
|----------------|----------------------------------------------------------------|
| SS50377_16979  | GTGAGTTTTAACAACTGAGACCGGTTTGGTCTCAGAAATCTTAACTTTTACTAACAAACTAG |
| SS50377_16134  | GTATGTTTTAA-----CAATTAAAAAATAACTTATACTAACAAACTAG               |
| SS50377_18398  | GTATGTTTTAA-----CTCAATAAATACAACCTTTTACTAACAAACTAG              |
| SS50377_17358* | GTATGTCTAAA-----CTTTTTTAATGTAACCTATACTAACAAACTAG               |
|                | ** . ** . * ** * * .***** *****                                |
