# Supplementary material for: The Genome of Spironucleus salmonicida Highlights a Fish Pathogen Adapted to Fluctuating Environments
Source: PubMed Central journal article supplement (PMC3916229; doi:10.1371/journal.pgen.1004053), 2014-02-06

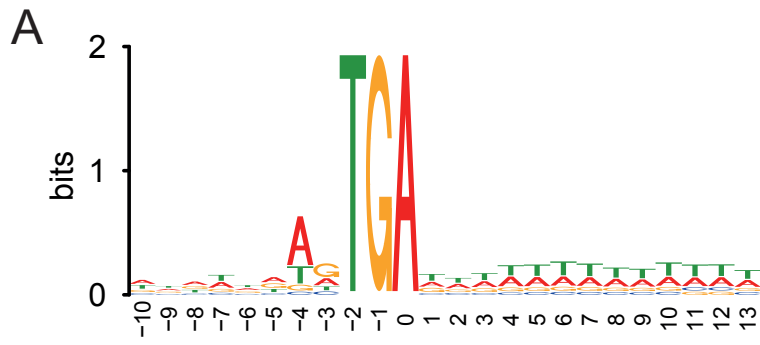

**B**

*S. salmonicida* polyadenylation

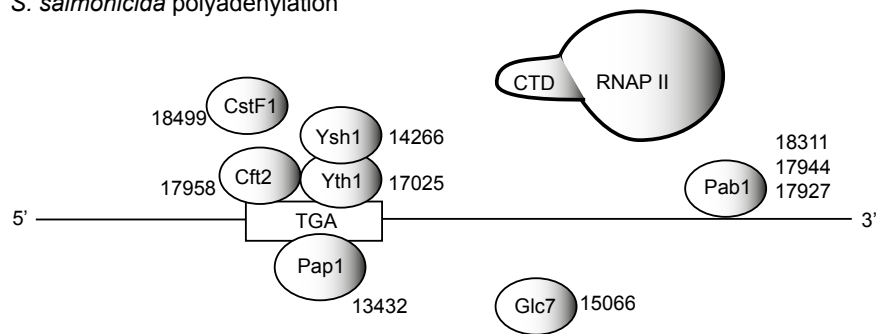

*G. intestinalis* polyadenylation

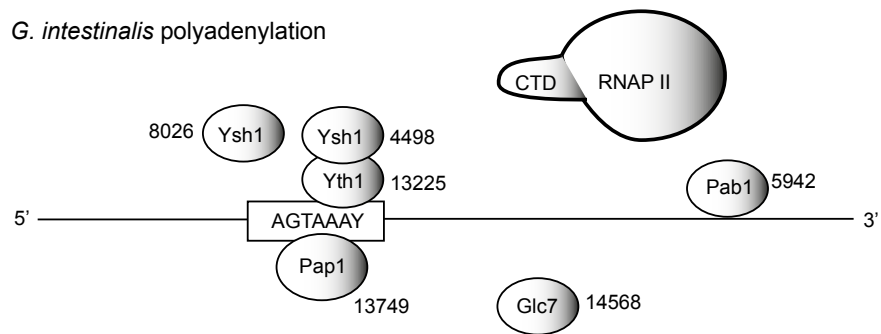

Supplement: pgen.1004053.s005.pdf [file pgen.1004053.s005.pdf]
