# Supplementary material for: The Genome of Spironucleus salmonicida Highlights a Fish Pathogen Adapted to Fluctuating Environments
Source: PubMed Central journal article supplement (PMC3916229; doi:10.1371/journal.pgen.1004053), 2014-02-06
Supplement: pgen.1004053.s007.pdf [file pgen.1004053.s007.pdf]

10 20 30 40 50 60 70 80 90

```

SS50377_11345/585-679 CVNGAMAVNGVCKVCSENOELSGCSNKSVGKTVGIVVAVLVITIMLSIGVGFVVKVKRNKKIEGLVSGEVTOGVLLKIGASSPOMRQSDQNY
SS50377_18027/364-429 -----TLMSTGSIIGIVVAAIILTICVVGALTIIFIIKRRKKTVVVAKQDLVKNNSRQINRSMSWNSKIQ
SS50377_15964/364-429 -----TLMSTGSIIGIVVAVIILTICVVGALTIIFIIKRRKKTVVVAKSDLVSNTRSQINRSMSWNSKIQ
SS50377_17215/364-429 -----TLTNTGSIIGIVVAVIILTICVVGALTIIFIIKRRKKTVVVAKQDLVKNNSRTYINGSMSQNSKIQ
SS50377_10628/438-486 -----EKPEKNKVLTAIINIGMVFALIIICGILGIIIIYVRRPKRHTFOHSMAR
SS50377_16104/1268-1316 -----QKEPNQVLVTNIVGMIVACITAVGFITGVVVFYAKRPKRYTFQHAITQ
SS50377_14561/1272-1320 -----QEQRNESLFIANIAGMVAVAVAAGIIIA-GVSIIFYAKRPKRYSFQHAMIE
SS50377_18013/662-722 -----AENOSGMPITSTIACIVGGILVVIIVGVSVGLAVYLRKQKQKRFNSIPTSDNNVEPLSNVLR
SS50377_12088/332-382 -----ADEHSAGTFEVGAYLVGIVAAVLALISVCV-ITAYIVVKKAKKSPGVVAISIIY
SS50377_11940/397-447 -----QKIMLSDPLTARNYLGPAAAVVFIVCI--GVVLYFVKRVRKNTKVTATAIN
SS50377_13212/257-307 -----YTEKSGALIFSTSIIGIIVSIAVLTICIGVVAYNEAKKDRKAPVPGMTAIN
SS50377_12850/611-661 -----KQELTRDTLGLSTYLGAAAAIGILTFISVGV-AVAYIAVKKARKAAQVAATAIN
SS50377_13120/245-297 -----QTDGQVLRGGSIIGIIFSLAVVIGGLIGIALFLIKKCKKVPDVGVTNNLE
SS50377_17515/547-590 -----PDVPEEDGKLSGGAIAGIVIAMLVVIGGICGVVYVYLMKRYKK
SS50377_16406/248-333 -----SDSNIGGDSSEGNTGSDTSDNISKSGVNGIIAAITIGCLFICSTVGIILYYMKRKRSKNQAVFTKKLAPAFIFNTDQIMTNK
SS50377_jh058/226-285 -----GQGGDDGGDDDAKRGGLSGGAIAGIVIGVLAIVGAVG-GLGWFLVSRKGRKAPVGRPKW
SS50377_17639/248-319 -----PVPEPVEPVEPVPVDPSP-NPSTSNKSNLGGAIISGIIIGALAVVGAISGTIVIV-IMKRSRKNQVSTDTGAVNILE
SS50377_12053/232-275 -----ETTLPISGKNIKSGSVITGVIIIGLSVI-LLLEGCIITYFFIKKTKK
SS50377_17501/250-291 -----SILPGANKLGGAIITGVIIIGGLAVISAAAGGLAYYIIRKAKK
SS50377_12525/250-291 -----TTSSESNKLSGGAIVGIVIGALVIVGVVGGGLAYYFIRKARK
SS50377_16398/249-290 -----GSAESGNLGGGAIAGIIATLVVYVGGVGGGLAYYFIRKSKK
SS50377_17799/272-311 -----APLGTNLSGGAIAGIVVAVLVVVLGALGGGLAFYLIKRKSKK
SS50377_10881/271-312 -----APDNPGSNLGGAVTGVIVGLVAVLGAIGGGVAFYFIKRSKR
SS50377_17646/304-349 -----PRRPLLVVSLAGRSRSSLQPLVVICGVGNCLILLYFKKAKKQQLK
SS50377_11553/305-350 -----SEEAALGGISGGEITAITAALVVICGVNCLILLYFKKAKKQQLK
SS50377_12645/240-281 -----AEPASANKLGGAIAGIVIAVLLVVVGGGLAYYFIRKSKK
SS50377_11556/273-314 -----VPESSSNKLSGGAVAGIVIAVLLVVVGGVGGGLAYYFIRKARK
SS50377_17084/304-342 -----VTANKLGGAIAGIVIAVLLVVVGGVGGGLAYYFIRKAKK
SS50377_18125/335-376 -----VPESSSNKLSGGAVAGIVIAVLLVVVGGVGGGLAYYFIRKARK
SS50377_17647/334-375 -----VQESSSNKLSGGAVAGIVVAVLVVAGVGGGLAFYFIRKARK
SS50377_17372/126-165 -----LIPSRNLSRGAVAGILVAVLVVGGVGGGLAFYFIRKCKK
SS50377_17602/283-322 -----KRESGNLGGAAAGIVLGAVVVVGGVGGGLAYYFIRKAKK
SS50377_17746/132-171 -----RKEAGNLGGAVTGMIAVLLVGGVGGGLVYFIRKAKK
SS50377_15953/574-613 -----RKEYVSLSGGTVTKIVIAVLLVAGGAGGLTYFIRKAKK
SS50377_17513/680-719 -----KRESGNLGGAVAGIVIAVLLVVVGGVGGGLAYYFIRKCKK
SS50377_12258/183-242 -----NPEPEPEPPIPVPPAPVDPSPDP-SNKLSTGATVIGVIGALVAVGAIIGGGGLAFYFIRRSCKK
SS50377_12257/175-234 -----EPPPIPVPPTPVPGPSDPSDAPDP-SNKLSTGATVIGVIGALVAVGAIIGGGGLAFYFIRRSCKK
SS50377_17777/150-207 -----EVDPPNPPGPVPPVPGPSDAPDP-SNKLSTGATVIGVIGALVAVGAIIGGGGLAFYFIRRSCKK
SS50377_15539/245-297 -----GSSPSTNNMSGGAIAGIIAVLVVIGAVI-GLIILLIRKNNKTOPISGVKRDLI
SS50377_17890/106-147 -----ESQGGSTNMSGGAIAGIVIASLVVYVGGVGGGLAYYFIRKLRK
SS50377_11595/250-291 -----SSSGNSNMSGGAIAGIVIAVLLVVVGGVGGGLAYYFIRKAKK
SS50377_17168/250-291 -----SSSGEGSNMSGGAIAGIVVAVLVVGGVGGGLAYYFIRKAKK
SS50377_15453/168-214 -----EAAEPEVVVDRVSTGTGVIVGIVGVVAVIGAVGGGLAYYFIRKCKK
SS50377_10064/91-162 -----PNPPTINPDPVSKPTDPEATEESKNTRLSSGAIVGIVLGVAVAAVVGGGLAYYFIRKHKKAAAGGSATQVOVE
SS50377_11344/152-208 -----GTDPNIPVNPMDPVPDPEVPTSNKLSGGAIITGVIGAVVVVGGVGGGLAYYFIRKCKK
SS50377_10639/166-225 -----PVVPPVDPNVPVPPPEQVPDPEAPASNKLSGGAVTGVIVGVLLVGGVGGGLAYYFIRKCKK
SS50377_11341/151-208 -----QPEDPNIPAPPVAVDPEAPASNKLSGGAVTGVIVGVLLVGGVGGGLAYYFIRKCKK
SS50377_10017/160-219 -----PVDPPEVPPVVPVVPVDPPEAPASNKLSGGAVTGVIVGVLLVGGVGGGLAYYFIRKCKK
SS50377_18852/196-255 -----DVPVPEVVPDPTLPEEDNSQNLGGAVAGILVGLVVVGGVGGGLAYYFIRKAKKRV EQO
SS50377_18953/199-258 -----DVVAGEVPPVPPGNPVVPPPEVNRQNLGGAVAGIVIGVLLVVGGVGGGLTYFIRKAKK
SS50377_18861/198-257 -----DVVAGEVPPVPPGDPVVPPEPGVNSYRLSGGAVAGIVVGLLVVIGAVGGGLAYYFIRROKK
SS50377_15471/245-292 -----EVESENKISGGAIAGIVIGVAVVGVGGVAYYLVKRAKRLVLSAQ
SS50377_15526/249-289 -----FNSSQNKISGGAIAGIVIAVLLVVVGGVGGGLAFYFIRKAKK
SS50377_17757/243-284 -----QGGVQNKISGGAIAGIIIGVLAVASAVGGGLAYYFIRKAKK
SS50377_15819/243-284 -----KSGEVNRIITGTGVIVGVVGLVAVVGGVGGGLAFYFIRKAKK
SS50377_18965/243-289 -----QGTGTNRIITGTGVIVGVVGLVAVVGGVGGGLAYYFIRKAKKRV EQO
SS50377_18952/243-284 -----KESSEATKIGAGAVVCIVLGGVGGVGGVGGGLAYYFIRKCKK
SS50377_18918/243-284 -----QKSGGVNRIITGTGVIVGVVGLVAVVGGVGGGLAYYFIRKAKK
SS50377_18923/243-289 -----QQGSEANKIITGTGVIVGVVGLVAVVGGVGGGLAYYFIRKAKKRV EQO
SS50377_18841/243-289 -----ENSGEVNRIITGTGVIVGVVGLVAVVGGVGGGLAYYFIRKAKKRV EQO
SS50377_18844/243-284 -----QQGSEANKIITGTGVIVGVVGLVAVVGGVGGGLAYYFIRKAKK
SS50377_18999/291-355 -----VPPSPVPVVPVPTSPNPDP-EVNSQNLSSGAVTGVIVGLLVVGAIGGGGLAYYFIRKAKKRV EQO
SS50377_18967/119-178 -----PAPPEPHGPDVVPVPTSPDPNP-EVNRQNLSSGAVTGVIVGLLVVGGVGGGLAYYFIRKCKK
SS50377_18882/243-298 -----TPVPTPPSPDPPGDP-EVNTQNLSSGAVAGIVIGVLLVGGVGGGLTYFIRKCKK
SS50377_18907/243-284 -----QQGSEANKISGGAIVGIVISLVVGGVGGGLTYFIRKCKK
SS50377_18908/304-363 -----DVPTPPAPEPVPVPTSPGPD-EVNRQNLSSGAVAGIVIGVLLVGGVGGGLTYFIRKAKK

```
