# Supplementary material for: The Genome of Spironucleus salmonicida Highlights a Fish Pathogen Adapted to Fluctuating Environments
Source: PubMed Central journal article supplement (PMC3916229; doi:10.1371/journal.pgen.1004053), 2014-02-06
Supplement: pgen.1004053.s008.pdf [file pgen.1004053.s008.pdf]

## Glucose, pentose-phosphate and selected sugar metabolism

1. glucokinase
2. glucose phosphate isomerase
3. pyrophosphate-dependent phosphofructokinase
4. fructose biphosphate aldolase
5. triosephosphate isomerase
6. glyceraldehyde 3-phosphate dehydrogenase
7. phosphoglycerate kinase
8. phosphoglyceromutase
9. enolase
10. glyceralate kinase
11. phosphomannose isomerase
12. glucosamine 6-phosphate deaminase
13. glucosamine 6-phosphate N-acetyltransferase
14. phosphoglucomutase
15. maltose O-acetyltransferase
16. phosphoacetylglucosamine mutase
17. UDP-N-acetylglucosamine pyrophosphorylase
18. UDP-N-acetylglucosamine 4' epimerase
19. galactokinase
20. UDP-glucose 4' epimerase
21. galactose mutarotase
22. β-galactosidase
23. UDP-glucose-1 phosphate uridylyltransferase
24. glucose 6-phosphate 1-epimerase
25. fructokinase
26. glycogen synthase
27. glycogen phosphorylase
28. bifunctional glucose 6-phosphate 1-dehydrogenase / 6-phosphogluconolactonase
29. 6-phosphogluconate dehydrogenase (decarboxylating)
30. transketolase
31. ribose 5-phosphate isomerase
32. ribokinase
33. phosphoribosylpyrophosphate synthetase
34. ribulose phosphate 3-epimerase
35. deoxyribose-phosphate aldolase
36. α-galactosidase
37. ADP-specific glucokinase
38. β-hexosaminidase B (glycosyl hydrolase family 20)
39. α-amylase (glycosyl hydrolase family 13)

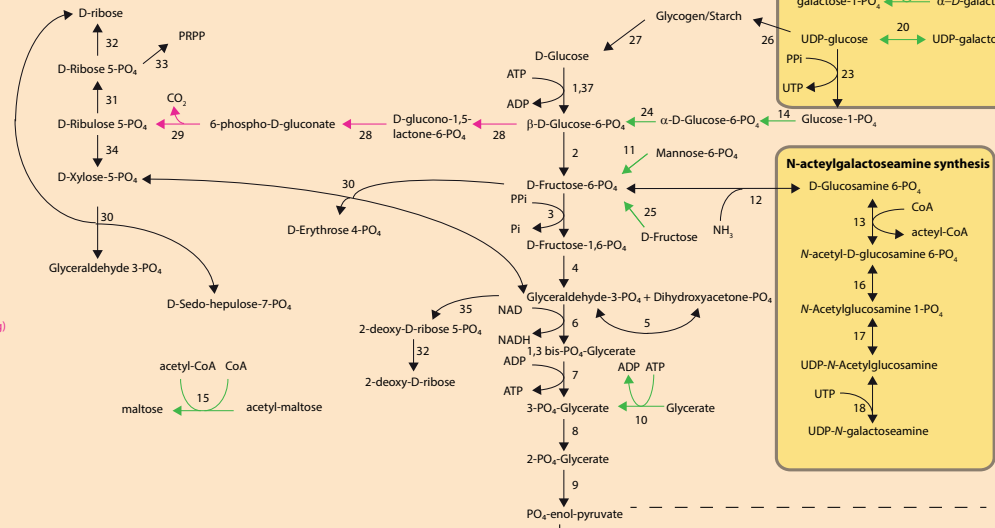

## Intermediate pathways to pyruvate synthesis with amino acid fermentation

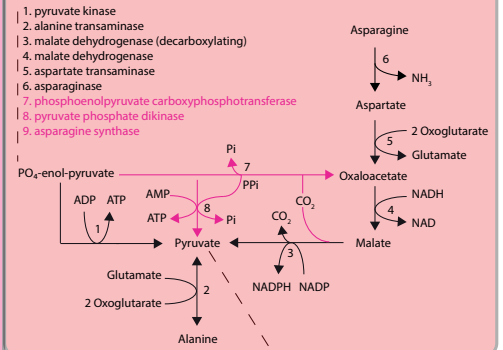

## End product synthesis from pyruvate

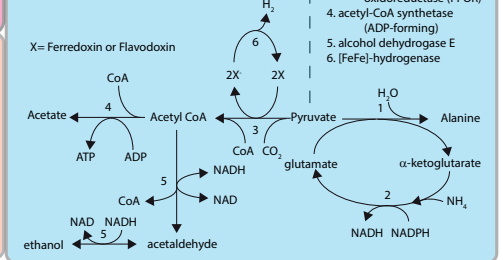

## Purine ribonucleoside scavenging

1. purine nucleoside phosphorylase
2. inosine-uridine nucleoside N-ribohydrolase
3. adenine phosphoribosyltransferase
4. guanine phosphoribosyltransferase
5. adenylate kinase
6. guanylate kinase

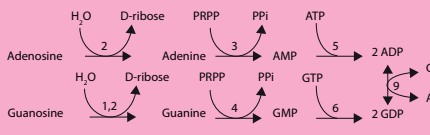

## Pyrimidine ribonucleoside scavenging

7. uracil phosphoribosyltransferase
8. UMP kinase
9. nucleoside diphosphate kinase
10. CTP synthase
11. cytidine deaminase
12. UMP-CMP kinase
13. uridine/thymine phosphorylase
14. cytosine deaminase
15. cytidine hydrolase

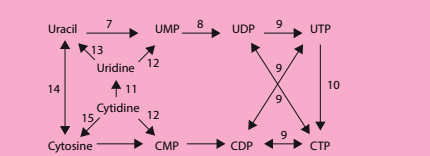

## Deoxynucleoside scavenging

16. deoxyuridine 5'-triphosphate nucleotidohydrolase
17. deoxyguanosine kinase
18. deoxynucleoside kinase
19. thymidine kinase
20. thymidylate kinase

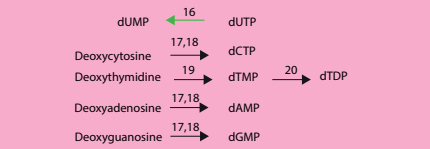

## Terpenoid biosynthesis

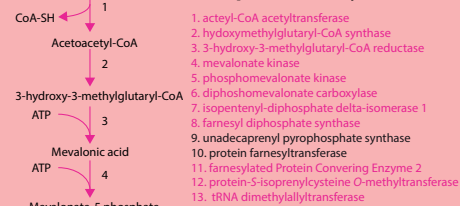

1. acetyl-CoA acetyltransferase
2. hydroxymethylglutaryl-CoA synthase
3. 3-hydroxy-3-methylglutaryl-CoA reductase
4. mevalonate kinase
5. phosphomevalonate kinase
6. diphosphomevalonate carboxylase
7. isopentenyl-diphosphate delta-isomerase 1
8. farnesyl diphosphate synthase
9. undecaprenyl pyrophosphate synthase
10. protein farnesyltransferase
11. farnesylated Protein Converting Enzyme 2
12. protein-5-isoprenylcysteine O-methyltransferase
13. tRNA dimethylallyltransferase

## GPI-anchor synthesis

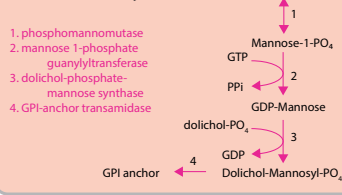

1. phosphomannomutase
2. mannose 1-phosphate guanylyltransferase
3. dolichol-phosphate-mannose synthase
4. GPI-anchor transamidase

## Arginine dihydrolase pathway and proline metabolism

1. arginine deiminase
2. ornithine carbamoyl transferase
3. carbamate kinase
4. ornithine cyclodeaminase
5. pyrroline-5-carboxylate reductase
6. ornithine decarboxylase

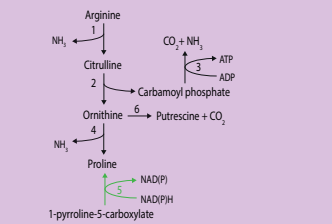

## Tryptophan, Serine, Glycine, Cysteine and Methionine metabolism

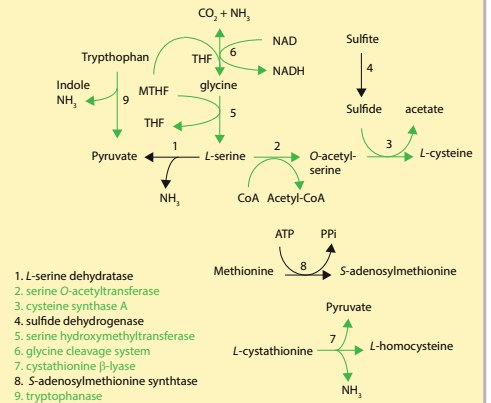

1. L-serine dehydratase
2. serine O-acetyltransferase
3. cysteine synthase A
4. sulfide dehydrogenase
5. serine hydroxymethyltransferase
6. glycine cleavage system
7. cystathionine β-lyase
8. S-adenosylmethionine synthetase
9. tryptophanase

## coenzyme A biosynthesis

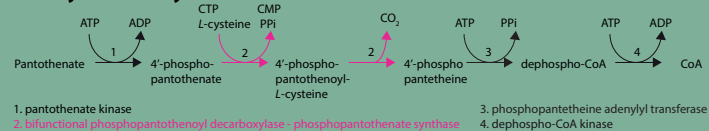

1. pantothenate kinase
2. bifunctional phosphopantetheinyl decarboxylase - phosphopantetheine synthase
3. phosphopantetheine adenyl transferase
4. dephospho-CoA kinase
