# Supplementary material for: The Genome of Spironucleus salmonicida Highlights a Fish Pathogen Adapted to Fluctuating Environments
Source: PubMed Central journal article supplement (PMC3916229; doi:10.1371/journal.pgen.1004053), 2014-02-06

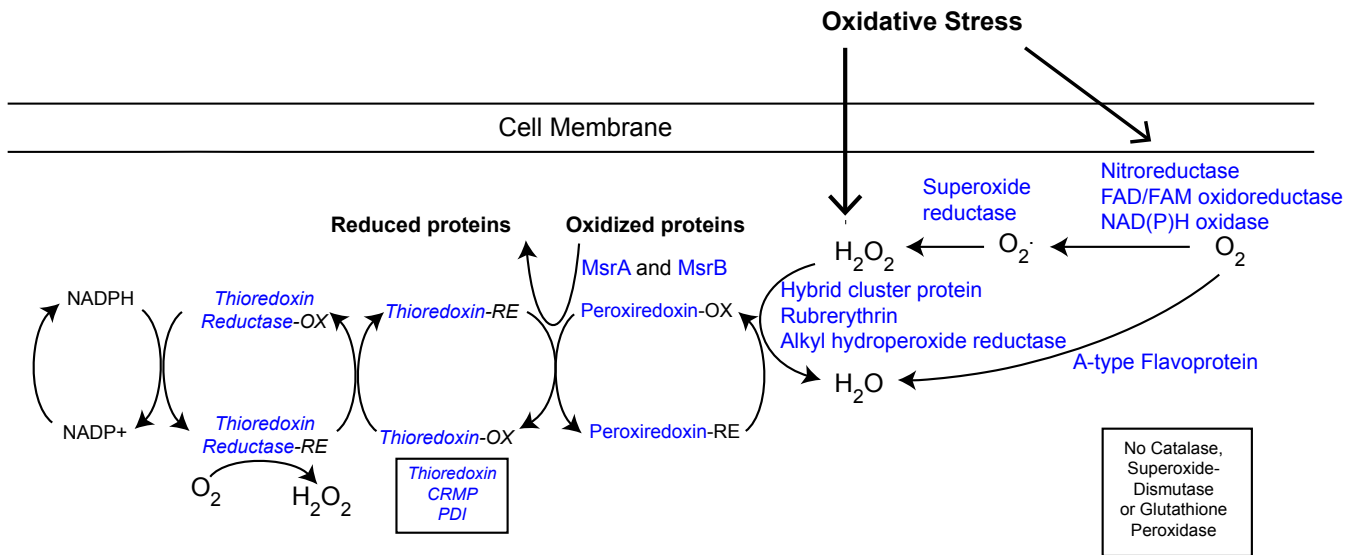

Supplement: pgen.1004053.s009.pdf [file pgen.1004053.s009.pdf]
