# Supplementary material for: The Genome of Spironucleus salmonicida Highlights a Fish Pathogen Adapted to Fluctuating Environments
Source: PubMed Central journal article supplement (PMC3916229; doi:10.1371/journal.pgen.1004053), 2014-02-06
Supplement: pgen.1004053.s011.pdf [file pgen.1004053.s011.pdf]

**Table S1 *S. salmonicida* proteins without homologs in *G. intestinalis***

| <b>Count</b> | <b>Gene annotation</b>                                                                |
|--------------|---------------------------------------------------------------------------------------|
| 3867         | Hypothetical protein                                                                  |
| 240          | Transmembrane domain-containing protein                                               |
| 156          | Conserved hypothetical protein                                                        |
| 64           | Myb-like DNA-binding domain-containing protein                                        |
| 43           | Cysteine-rich membrane protein 2                                                      |
| 40           | Cysteine-rich membrane protein 1                                                      |
| 25           | Cysteine-rich protein                                                                 |
| 10           | Palmitoyl-protein thioesterase                                                        |
| 6            | E2F/DP family winged-helix DNA-binding domain-containing protein                      |
| 6            | Major facilitator superfamily protein                                                 |
| 5            | Zinc finger, C2H2 type domain-containing protein                                      |
| 4            | Carotenoid isomerase                                                                  |
| 4            | Frataxin-like protein                                                                 |
| 4            | RNA recognition motif-containing protein                                              |
| 3            | Aldose 1-epimerase                                                                    |
| 3            | Beta-galactosidase                                                                    |
| 3            | Cysteine synthase A                                                                   |
| 3            | Glycosyl hydrolase family 20 protein                                                  |
| 3            | Hemolysin III family protein                                                          |
| 3            | LSM domain protein                                                                    |
| 3            | Lipase class 3 family protein                                                         |
| 3            | Plasma-membrane choline transporter and transmembrane domain-containing protein       |
| 3            | Rubryerythrin 1                                                                       |
| 3            | TBC domain-containing protein                                                         |
| 3            | Tryptophanase                                                                         |
| 3            | Ubiquitin carboxyl-terminal hydrolase family protein                                  |
| 3            | Zinc finger domain-containing protein                                                 |
| 2            | 5' nucleotidase family protein                                                        |
| 2            | Bifunctional phosphopantothoenylcysteine decarboxylase - phosphopantothenate synthase |
| 2            | Bromodomain-containing protein                                                        |
| 2            | CLN3 protein                                                                          |
| 2            | Calponin homology (CH) domain-containing protein                                      |
| 2            | Cofilin/tropomyosin-type actin-binding protein                                        |
| 2            | EAP30/Vps36 domain-containing protein                                                 |
| 2            | Galactokinase                                                                         |
| 2            | Glucokinase, ROK family                                                               |
| 2            | Glycerophosphoryl diester phosphodiesterase family protein                            |
| 2            | HMG (high mobility group) box domain-containing protein                               |
| 2            | Hsp20/alpha crystallin family protein                                                 |
| 2            | M18 family aminopeptidase                                                             |
| 2            | Macro domain-containing protein                                                       |
| 2            | Maltose O-acetyltransferase                                                           |
| 2            | Microsomal signal peptidase 12 kDa subunit (SPC12)-containing protein                 |
| 2            | Peptidase T                                                                           |
| 2            | Prefoldin subunit-containing protein                                                  |
| 2            | Putative ferredoxin                                                                   |
| 2            | Pyridoxamine 5'-phosphate oxidase domain-containing protein                           |
| 2            | Rubryerythrin 2                                                                       |
| 2            | SCP-like extracellular protein                                                        |
| 2            | SET domain-containing protein                                                         |

| <b>Count</b> | <b>Gene annotation</b>                                                   |
|--------------|--------------------------------------------------------------------------|
| 2            | SH3 domain-containing protein                                            |
| 2            | SNF7 family protein                                                      |
| 2            | SPFH domain/Band 7 family protein                                        |
| 2            | Sec1 family protein                                                      |
| 2            | Selenium-dependent molybdenum hydroxylase system protein, YqeB family    |
| 2            | TB2/DP1, HVA22 family protein                                            |
| 2            | Transglutaminase/protease-like domain-containing protein                 |
| 1            | 2,3-bisphosphoglycerate-independent phosphoglycerate mutase              |
| 1            | 3' exoribonuclease family protein                                        |
| 1            | 4-alpha-glucanotransferase                                               |
| 1            | 4Fe-4S ferredoxin iron-sulfur binding domain protein                     |
| 1            | 5'-nucleotidase                                                          |
| 1            | 50S ribosomal protein L12P domain-containing protein                     |
| 1            | ADP-ribosylglycohydrolase                                                |
| 1            | ADP-specific phosphofructokinase                                         |
| 1            | ARID/BRIGHT DNA binding domain-containing protein                        |
| 1            | Abnormal spindle-like microcephaly-associated protein-like protein       |
| 1            | Acetyltransferase, GNAT family                                           |
| 1            | Actin related protein                                                    |
| 1            | Actin-related protein 2/3 complex subunit                                |
| 1            | Adaptor complexes medium subunit family protein                          |
| 1            | Adenylyl cyclase-associated protein                                      |
| 1            | Aldehyde dehydrogenase                                                   |
| 1            | Aldose 1-epimerase domain-containing protein                             |
| 1            | Alpha amylase catalytic region                                           |
| 1            | Alpha-galactosidase                                                      |
| 1            | Amino acid permease domain-containing protein                            |
| 1            | Ankyrin repeat-containing protein                                        |
| 1            | Annexin                                                                  |
| 1            | Apurinic/aprimidinic endonuclease                                        |
| 1            | Aspartate kinase I domain-containing protein                             |
| 1            | B9 domain-containing protein                                             |
| 1            | B9 protein family domain-containing protein                              |
| 1            | BadF/BadG/BcrA/BcrD ATPase family protein                                |
| 1            | Band 7/Mec-2 family protein                                              |
| 1            | C-terminal proteasome-interacting domain of thioester-containing protein |
| 1            | C2H2-type zinc finger domain-containing protein                          |
| 1            | CAF1 family ribonuclease                                                 |
| 1            | COPI associated protein                                                  |
| 1            | CYTH-like domain-containing protein                                      |
| 1            | Calcineurin-like phosphoesterase                                         |
| 1            | Calcineurin-like phosphoesterase domain-containing protein               |
| 1            | Calmodulin                                                               |
| 1            | Calponin homology (CH) domain and Ras family domain-containing protein   |
| 1            | Caretonoid isomerase                                                     |
| 1            | Central repeat-containing protein                                        |
| 1            | Chromodomain-containing protein                                          |
| 1            | Co-chaperone GrpE                                                        |
| 1            | Cornichon protein                                                        |
| 1            | Cyclin                                                                   |
| 1            | Cyclin N-terminal domain-containing protein                              |
| 1            | Cyclin, N-terminal domain-containing protein                             |
| 1            | Cystatin domain protein                                                  |

| <b>Count</b> | <b>Gene annotation</b>                                                       |
|--------------|------------------------------------------------------------------------------|
| 1            | Cystatin domain-containing protein                                           |
| 1            | Cysteine synthase                                                            |
| 1            | DHHC zinc finger and transmembrane domain-containing protein                 |
| 1            | DHHC zinc finger domain and transmembrane domain-containing protein          |
| 1            | DHHC zinc finger domain-containing protein                                   |
| 1            | DNA binding domain-containing protein                                        |
| 1            | DNA cross-link repair protein                                                |
| 1            | DTW domain-containing protein                                                |
| 1            | DUSP domain-containing protein                                               |
| 1            | Deoxyuridine 5'-triphosphate nucleotidohydrolase                             |
| 1            | Dual specificity phosphatase                                                 |
| 1            | Dynactin subunit p22 family protein                                          |
| 1            | EAP30/Vps36 family protein                                                   |
| 1            | ELMO/CED-12 family protein                                                   |
| 1            | EMP24/GP25L/P24 family/GOLD family protein                                   |
| 1            | ESCRT-II complex subunit-containing protein                                  |
| 1            | Elongation factor Tu GTP binding and transmembrane domain-containing protein |
| 1            | Endonuclease IV                                                              |
| 1            | Endonuclease/Exonuclease/phosphatase family protein                          |
| 1            | Endonuclease/exonuclease/phosphatase family protein                          |
| 1            | Eukaryotic initiation factor 4E-like protein                                 |
| 1            | Eukaryotic translation initiation factor 4E like protein                     |
| 1            | Exosome 3'-5' exoribonuclease complex, subunit Rrp6p                         |
| 1            | F420 ligase family protein                                                   |
| 1            | F420-0:Gamma-glutamyl ligase superfamily protein                             |
| 1            | FAD binding domain-containing protein                                        |
| 1            | FYVE zinc finger domain-containing protein                                   |
| 1            | Fe-S protein assembly chaperone HscA domain-containing protein               |
| 1            | Ferredoxin                                                                   |
| 1            | Fip1 motif-containing protein                                                |
| 1            | FolC bifunctional family protein                                             |
| 1            | Formin homology 2 domain-containing protein                                  |
| 1            | Frataxin                                                                     |
| 1            | Fructokinase                                                                 |
| 1            | GCN5-like protein 1 (GCN5L1) family member                                   |
| 1            | GCN5-related N-acetyltransferase                                             |
| 1            | GINS complex subunit Sld5                                                    |
| 1            | GOLD domain-containing protein                                               |
| 1            | Gar1/Naf1 RNA binding region-containing protein                              |
| 1            | Glutathione S-transferase C-terminal-like domain-containing protein          |
| 1            | Glycerate kinase                                                             |
| 1            | Got1/Sft2-like family protein                                                |
| 1            | HD domain-containing protein                                                 |
| 1            | HEC/Ndc80p domain-containing protein                                         |
| 1            | HECT E3 ubiquitin-protein ligase                                             |
| 1            | HECT domain-containing protein                                               |
| 1            | HIT zinc finger domain-containing protein                                    |
| 1            | Haloacid dehalogenase-like hydrolase family protein                          |
| 1            | Homeobox domain-containing protein                                           |
| 1            | Hydrolase, TatD family                                                       |
| 1            | Initiation factor 2 subunit family protein                                   |
| 1            | Ion channel and transmembrane domain-containing protein                      |
| 1            | Isoamyl acetate-hydrolyzing esterase 1 protein                               |

| <b>Count</b> | <b>Gene annotation</b>                                                                 |
|--------------|----------------------------------------------------------------------------------------|
| 1            | KH domain-containing protein                                                           |
| 1            | KIF1-binding domain-containing protein                                                 |
| 1            | Kinetochore protein nuf2                                                               |
| 1            | L-seryl-tRNA(Sec) kinase                                                               |
| 1            | LSM domain-containing protein                                                          |
| 1            | Las1-like family protein                                                               |
| 1            | MADS-box protein                                                                       |
| 1            | Mannose-6-phosphate isomerase, class I                                                 |
| 1            | Meckelin and transmembrane domain-containing protein                                   |
| 1            | Metallo-beta-lactamase superfamily protein                                             |
| 1            | Methyltransferase TRM13 family protein                                                 |
| 1            | Methyltransferase domain-containing protein                                            |
| 1            | Mib_herc2 domain-containing protein                                                    |
| 1            | Mitochondrial import inner membrane translocase subunit TIM14                          |
| 1            | Multidrug resistance protein                                                           |
| 1            | NAD dependent epimerase/dehydratase                                                    |
| 1            | NADH pyrophosphatase                                                                   |
| 1            | NUDIX hydrolase                                                                        |
| 1            | Neutral sphingomyelinases (nSMase) family protein                                      |
| 1            | Nitroreductase                                                                         |
| 1            | Nrap family protein                                                                    |
| 1            | Nuclear transport factor 2                                                             |
| 1            | Nuf2 family protein                                                                    |
| 1            | O-phosphoseryl-tRNA(Sec) selenium transferase                                          |
| 1            | OTU-like cysteine protease domain-containing protein                                   |
| 1            | PCI domain-containing protein                                                          |
| 1            | POP1 domain-containing protein                                                         |
| 1            | PPPDE putative peptidase domain protein                                                |
| 1            | PPPDE putative peptidase domain-containing protein                                     |
| 1            | Paired box domain-containing protein                                                   |
| 1            | Pantothenate kinase                                                                    |
| 1            | Peptidase family M50 protein                                                           |
| 1            | Peptidyl-dipeptidase                                                                   |
| 1            | Peptidyl-prolyl cis-trans isomerase                                                    |
| 1            | Phage/plasmid primase                                                                  |
| 1            | Phosphatidate cytidyltransferase domain-containing protein                             |
| 1            | Phosphatidylserine decarboxylase                                                       |
| 1            | Phosphopantetheine adenylyltransferase                                                 |
| 1            | Plasma-membrane choline transporter                                                    |
| 1            | Pominin domain-containing protein                                                      |
| 1            | Proteasome activator pa28 beta subunit-containing protein                              |
| 1            | Protein tyrosine kinase domain-containing protein                                      |
| 1            | Protein tyrosine phosphatase                                                           |
| 1            | Putative ATP synthase                                                                  |
| 1            | Putative RNA polymerase I specific transcription initiation factor RRN3 family protein |
| 1            | Putative RNA polymerase Rpb4 protein                                                   |
| 1            | Putative glycine cleavage system H protein                                             |
| 1            | Putative nuclear pore protein                                                          |
| 1            | Putative plastin                                                                       |
| 1            | Pyrroline-5-carboxylate reductase                                                      |
| 1            | RING finger domain-containing protein                                                  |
| 1            | RING finger-containing protein                                                         |
| 1            | RNA polymerase III RPC4 family protein                                                 |

| <b>Count</b> | <b>Gene annotation</b>                                             |
|--------------|--------------------------------------------------------------------|
| 1            | RNA polymerase Rpc34 subunit                                       |
| 1            | RNAse P Rpr2/Rpp21/SNM1 subunit domain-containing protein          |
| 1            | Rad50 zinc hook motif-containing protein                           |
| 1            | Ran-interacting Mog1 protein domain-containing protein             |
| 1            | Rap/ran-GAP family protein                                         |
| 1            | Ras family domain-containing protein                               |
| 1            | Ras guanine nucleotide exchange factor                             |
| 1            | Ras-like GTPase superfamily protein                                |
| 1            | RhoGAP domain-containing protein                                   |
| 1            | Rhodanese-like domain-containing protein                           |
| 1            | Rhodopsin-like GPCR transmembrane domain-containing protein        |
| 1            | Ribonuclease H                                                     |
| 1            | Ribonuclease Z                                                     |
| 1            | Ribophorin I family protein                                        |
| 1            | Ribosomal protein L29e                                             |
| 1            | Ribosomal protein L39                                              |
| 1            | Ribosomal protein S19e*                                            |
| 1            | Ribosomal protein S30                                              |
| 1            | STAS domain-containing protein                                     |
| 1            | Sec7 domain-containing protein                                     |
| 1            | Sedlin N-terminal conserved region-containing protein              |
| 1            | Serine acetyltransferase                                           |
| 1            | Serine hydroxymethyltransferase                                    |
| 1            | Signal peptide-containing protein                                  |
| 1            | Signal recognition particle receptor beta subunit                  |
| 1            | Sugar (and other) transporter family protein                       |
| 1            | Surfeit locus protein 6 family protein                             |
| 1            | Synaptobrevin                                                      |
| 1            | TATA-binding protein (TBP)                                         |
| 1            | TB2/DP1 and transmembrane domain-containing protein                |
| 1            | TLD domain-containing protein                                      |
| 1            | TLD family protein                                                 |
| 1            | Tenascin                                                           |
| 1            | Thermophilic metalloprotease (M29) family protein                  |
| 1            | ThiF family protein                                                |
| 1            | Thiamin pyrophosphokinase                                          |
| 1            | Thioredoxin-like domain-containing protein                         |
| 1            | TolA and transmembrane domain-containing protein                   |
| 1            | Transcription elongation factor Ef1 like domain-containing protein |
| 1            | Transcriptional coactivator p15                                    |
| 1            | Transcriptional coactivator p15 domain-containing protein          |
| 1            | Translation machinery associated TMA7 domain-containing protein    |
| 1            | Type IIB DNA topoisomerase domain-containing protein               |
| 1            | UDP-N-acetylglucosamine diphosphorylase                            |
| 1            | UDP-N-acetylglucosamine transferase subunit ALG14                  |
| 1            | UEV domain-containing protein                                      |
| 1            | Ubiquitin carboxyl-terminal hydrolase domain-containing protein    |
| 1            | Ubiquitin family domain-containing protein                         |
| 1            | Ulp1 protease family protein                                       |
| 1            | Uridine kinase domain-containing protein                           |
| 1            | V-SNARE N-terminal domain-containing protein                       |
| 1            | VMA21-like and transmembrane domain-containing protein             |
| 1            | Vacuolar ATP synthase subunit E                                    |

| Count | Gene annotation                                                   |
|-------|-------------------------------------------------------------------|
| 1     | Vacuolar-sorting protein SNF8                                     |
| 1     | Von Willebrand factor type A domain-containing protein            |
| 1     | WD domain, G-beta repeat-containing protein                       |
| 1     | WD40 domain-containing protein                                    |
| 1     | YL1 nuclear protein C-terminal domain-containing protein          |
| 1     | YbaK/prolyl-tRNA synthetases associated domain containing protein |
| 1     | YkWD family and domain-containing protein                         |
| 1     | Zinc carboxypeptidase-containing protein                          |
| 1     | Zinc finger C-x8-C-x5-C-x3-H type domain-containing protein       |
| 1     | Zinc finger, C3HC4 type (RING finger) domain-containing protein   |
| 1     | Zinc-finger of C2H2 type-containing protein                       |
| 1     | [FeFe]-hydrogenase assembly protein HydE                          |
| 1     | [FeFe]-hydrogenase assembly protein HydF                          |
| 1     | [FeFe]-hydrogenase assembly protein HydG                          |
| 1     | mRNA capping enzyme, beta chain                                   |
| 1     | pfkB family carbohydrate kinase, putative                         |
| 1     | tRNA (5-methylaminomethyl-2-thiouridylate)-methyltransferase      |
| 1     | tRNA splicing endonuclease                                        |

\*) Ribosomal protein S19e is annotated in *G. intestinalis* P15, but not *G. intestinalis* WB which was used for comparison.
