# Supplementary material for: The Genome of Spironucleus salmonicida Highlights a Fish Pathogen Adapted to Fluctuating Environments
Source: PubMed Central journal article supplement (PMC3916229; doi:10.1371/journal.pgen.1004053), 2014-02-06
Supplement: pgen.1004053.s012.pdf [file pgen.1004053.s012.pdf]

**Table S2 The kinome of *G. intestinalis* and *S. salmonicida*.**

| <b>Group</b> | <b>Family</b> | <b>Subfamily</b>        | <b><i>S. salmonicida</i></b> | <b><i>G. intestinalis</i></b> |
|--------------|---------------|-------------------------|------------------------------|-------------------------------|
| AGC          | Akt           | None                    | 2                            | 1                             |
| AGC          | AktR          | None                    | 1                            | 0                             |
| AGC          | NDR           | NDR-Unclassified        | 1                            | 1                             |
| AGC          | PDK1          | None                    | 1                            | 1                             |
| AGC          | PKA           | None                    | 1                            | 2                             |
| AGC          | PTF           | FPK                     | 0                            | 1                             |
| AGC          | RSK           | RSK-p3                  | 1                            | 0                             |
| CAMK         | CAMK-Unique   | None                    | 1                            | 1                             |
| CAMK         | CAMK1         | None                    | 0                            | 1                             |
| CAMK         | CAMK1         | CAMK1c                  | 2                            | 0                             |
| CAMK         | CAMKL         | AMPK                    | 8                            | 3                             |
| CAMK         | CAMKL         | CAMKL-Unclassified      | 0                            | 2                             |
| CAMK         | CAMKL         | CIPK                    | 0                            | 1                             |
| CAMK         | CAMKL         | MARK                    | 1                            | 0                             |
| CAMK         | CAMKL         | NuaK                    | 1                            | 0                             |
| CAMK         | CAMKL         | QIK                     | 1                            | 0                             |
| CK1          | CK1           | CK1-D                   | 2                            | 1                             |
| CMGC         | CDK           | CDK-Unclassified        | 6                            | 3                             |
| CMGC         | CDK           | CDC2                    | 3                            | 3                             |
| CMGC         | CDK           | CDK5                    | 1                            | 1                             |
| CMGC         | CDK           | CDK2                    | 1                            | 0                             |
| CMGC         | CDKL          | None                    | 2                            | 1                             |
| CMGC         | CK2           | None                    | 1                            | 1                             |
| CMGC         | CLK           | None                    | 2                            | 1                             |
| CMGC         | CMGC-GL1      | None                    | 0                            | 2                             |
| CMGC         | DYRK          | DYRK2                   | 3                            | 3                             |
| CMGC         | DYRK          | DYRK1                   | 2                            | 1                             |
| CMGC         | GSK           | None                    | 3                            | 2                             |
| CMGC         | MAPK          | Erk7                    | 2                            | 1                             |
| CMGC         | MAPK          | ERK1                    | 1                            | 1                             |
| CMGC         | RCK           | MAK                     | 3                            | 2                             |
| CMGC         | RCK           | MOK                     | 2                            | 1                             |
| CMGC         | SRPK          | None                    | 1                            | 1                             |
| Other        | Aur           | None                    | 1                            | 1                             |
| Other        | Bud32         | None                    | 1                            | 1                             |
| Other        | CAMKK         | None                    | 0                            | 1                             |
| Other        | CAMKK         | CAMKK-Unclassified      | 2                            | 0                             |
| Other        | CDC7          | None                    | 3                            | 1                             |
| Other        | Ciliate-D1    | None                    | 2                            | 0                             |
| Other        | Ciliate-E2    | Ciliate-E2-Unclassified | 8                            | 0                             |
| Other        | IKS           | None                    | 0                            | 1                             |
| Other        | NAK           | NAK-Unclassified        | 2                            | 2                             |
| Other        | NAK           | GAK                     | 1                            | 0                             |
| Other        | NEK           | NEK-Unclassified        | 1                            | 148                           |
| Other        | NEK           | Nek-GL4                 | 0                            | 51                            |
| Other        | NEK           | NEK-GL1                 | 0                            | 10                            |
| Other        | NEK           | NEK-GL3                 | 0                            | 4                             |
| Other        | NEK           | NEK-GL2                 | 0                            | 3                             |
| Other        | NEK           | NEK1                    | 8                            | 1                             |
| Other        | NEK           | NEK-GL5                 | 4                            | 0                             |

| <b>Group</b> | <b>Family</b> | <b>Subfamily</b>   | <b><i>S. salmonicida</i></b> | <b><i>G. intestinalis</i></b> |
|--------------|---------------|--------------------|------------------------------|-------------------------------|
| Other        | NEK           | NEK-GL6            | 3                            | 0                             |
| Other        | NEK           | NEK8               | 2                            | 0                             |
| Other        | Other-GL1     | None               | 0                            | 3                             |
| Other        | Other-Unique  | None               | 10                           | 8                             |
| Other        | PEK           | GCN2               | 1                            | 1                             |
| Other        | PLK           | PLK1               | 0                            | 1                             |
| Other        | PLK           | PLK-Unclassified   | 4                            | 0                             |
| Other        | SCY1          | None               | 1                            | 1                             |
| Other        | TTK           | None               | 1                            | 1                             |
| Other        | ULK           | ULK                | 6                            | 1                             |
| Other        | ULK           | Fused              | 1                            | 1                             |
| Other        | Uni1          | None               | 1                            | 1                             |
| Other        | VPS15         | None               | 0                            | 1                             |
| Other        | WEE           | WEE-Unclassified   | 3                            | 1                             |
| Other        | WNK           | None               | 1                            | 1                             |
| PKL          | CAK           | ChoK               | 1                            | 1                             |
| PKL          | CAK           | FruK               | 0                            | 1                             |
| PKL          | PIK           | PI3K               | 1                            | 2                             |
| PKL          | PIK           | PI4K               | 2                            | 1                             |
| PKL          | PIKK          | FRAP               | 2                            | 1                             |
| PKL          | PIKK          | PIKK-Unclassified  | 0                            | 1                             |
| PKL          | PIKK          | ATR                | 1                            | 0                             |
| PKL          | RIO           | RIO1               | 1                            | 1                             |
| PKL          | RIO           | RIO2               | 1                            | 1                             |
| STE          | STE11         | CDC15              | 1                            | 2                             |
| STE          | STE11         | STE11-Unclassified | 1                            | 1                             |
| STE          | STE20         | FRAY               | 1                            | 1                             |
| STE          | STE20         | MST                | 1                            | 1                             |
| STE          | STE20         | PAKA               | 0                            | 1                             |
| STE          | STE20         | YSK                | 0                            | 1                             |
| STE          | STE7          | MEK1               | 0                            | 1                             |
| STE          | STE7          | STE7-Unclassified  | 1                            | 0                             |
| TKL          | LISK          | LISK-DD1           | 1                            | 0                             |
