# Supplementary material for: The Genome of Spironucleus salmonicida Highlights a Fish Pathogen Adapted to Fluctuating Environments
Source: PubMed Central journal article supplement (PMC3916229; doi:10.1371/journal.pgen.1004053), 2014-02-06
Supplement: pgen.1004053.s013.pdf [file pgen.1004053.s013.pdf]

**Table S3 Identified protease families in *G. intestinalis* and *S. salmonicida*.**

| <b>Catalytic type</b> | <b>Clan</b> | <b>Family</b> | <b><i>S. salmonicida</i></b> | <b><i>G. intestinalis</i></b> |
|-----------------------|-------------|---------------|------------------------------|-------------------------------|
| Aspartic              | AA          | A28           | 0                            | 2                             |
| Aspartic              | AD          | A22           | 0                            | 1                             |
| Cysteine              | CA          | C1            | 33                           | 27                            |
| Cysteine              | CA          | C12           | 2                            | 0                             |
| Cysteine              | CA          | C19           | 11                           | 6                             |
| Cysteine              | CA          | C88           | 1                            | 0                             |
| Cysteine              | CD          | C13           | 0                            | 1                             |
| Cysteine              | CD          | C50           | 1                            | 1                             |
| Cysteine              | CE          | C48           | 1                            | 1                             |
| Cysteine              | CO          | C40           | 1                            | 0                             |
| Metallo               | MA          | M3            | 1                            | 0                             |
| Metallo               | MA          | M41           | 5                            | 5                             |
| Metallo               | MA          | M49           | 1                            | 2                             |
| Metallo               | MC          | M14           | 0                            | 1                             |
| Metallo               | MC          | M14           | 5                            | 5                             |
| Metallo               | ME          | M16           | 0                            | 1                             |
| Metallo               | ME          | M16           | 2                            | 2                             |
| Metallo               | MG          | M24           | 1                            | 1                             |
| Metallo               | MG          | M24           | 3                            | 2                             |
| Metallo               | MH          | M18           | 4                            | 0                             |
| Metallo               | MH          | M20           | 2                            | 0                             |
| Metallo               | MH          | M20           | 3                            | 2                             |
| Metallo               | MK          | M22           | 1                            | 1                             |
| Metallo               | MM          | M50           | 1                            | 0                             |
| Metallo               | MP          | M67           | 2                            | 2                             |
| Metallo               | MQ          | M29           | 2                            | 0                             |
| Threonine             | PB          | T1            | 14                           | 14                            |
| Serine                | SB          | S8            | 0                            | 1                             |
| Serine                | SC          | S9            | 0                            | 2                             |
| Serine                | SC          | S28           | 3                            | 2                             |
| Serine                | SF          | S26           | 1                            | 1                             |
| Serine                | SP          | S59           | 2                            | 2                             |
| Serine                | ST          | S54           | 2                            | 1                             |
| Metallo               | unassigned  | M79           | 0                            | 1                             |
| Inhibitor             | ID          | I4            | 3                            | 1                             |
| Cysteine              | None        | None          | 0                            | 1                             |
| Metallo               | None        | None          | 1                            | 2                             |
| Unknown               | None        | None          | 8                            | 3                             |
