# Supplementary material for: The Genome of Spironucleus salmonicida Highlights a Fish Pathogen Adapted to Fluctuating Environments
Source: PubMed Central journal article supplement (PMC3916229; doi:10.1371/journal.pgen.1004053), 2014-02-06
Supplement: pgen.1004053.s014.pdf [file pgen.1004053.s014.pdf]

**Table S4 Cysteine-rich proteins in *S. salmonicida*.**

| ID            | Group  | MW    | Cys% | CXXC | CXC | Transmembrane                                 | C-terminal sequence                                               |
|---------------|--------|-------|------|------|-----|-----------------------------------------------|-------------------------------------------------------------------|
| SS50377_15953 | CRMP-1 | 64.1  | 17   | 40   | 3   | VI AVL V V A G A G G V L T Y Y F I            | KKAKK                                                             |
| SS50377_16104 | CRMP-1 | 141.9 | 16   | 51   | 17  | I V G M I V A C I T A V G F I T G V V V F Y A | KRPKKYTFQHAI TQ                                                   |
| SS50377_17513 | CRMP-1 | 75.8  | 16   | 41   | 6   | A G I V I A V L V V V G A V G G G I A Y Y F I | KKGKK                                                             |
| SS50377_18003 | CRMP-1 | 64.4  | 16   | 35   | 5   | V T G I V I A V L V V A G V G G L A Y Y F     | IKKGKK                                                            |
| SS50377_18067 | CRMP-1 | 48.0  | 16   | 29   | 3   | V T G I V I A V L V V V G A V G G L A Y Y F   | IKKGKK                                                            |
| SS50377_10628 | CRMP-1 | 52.4  | 15   | 18   | 6   | I I G M V F A L I I I I C G I L G I I Y Y V   | RRPKRHTFQHSMAR                                                    |
| SS50377_11345 | CRMP-1 | 74.4  | 15   | 35   | 5   | T V G I V V A V L V I I M L S I G V G I F V V | KKVKRNNKKIEGLVSGEVTQGQVLKIGASSPQMRDQSDQNY                         |
| SS50377_11553 | CRMP-1 | 36.9  | 15   | 16   | 2   | T A I T I A A L V V I C G V G N C I L L Y F L | KKARKQQLK                                                         |
| SS50377_jh035 | CRMP-1 | 37.8  | 15   | 19   | 2   | A G I V I A V L T V A G A V G G L A Y Y F V   | KRARK                                                             |
| SS50377_11557 | CRMP-1 | 36.9  | 15   | 16   | 2   | T A I T I A A L V V I C G V G N C I L L Y F L | KKARKQQLK                                                         |
| SS50377_11942 | CRMP-1 | 140.3 | 15   | 51   | 17  | I A G M V V A A V A A V G I I A G V S I F Y A | KRPKKYSFQHNMAK                                                    |
| SS50377_11947 | CRMP-1 | 140.3 | 15   | 51   | 17  | I A G M V V A A V A A V G I I A G V S I F Y A | KRPKKYSFQHNMAK                                                    |
| SS50377_13232 | CRMP-1 | 37.9  | 15   | 19   | 2   | A G I V I A V L V V A G A V G G L A F Y F I   | KKGKK                                                             |
| SS50377_13269 | CRMP-1 | 139.8 | 15   | 51   | 17  | I A G M V V A A V A A V G I I A G V S I F Y A | KRPKKYSFQHS MGK                                                   |
| SS50377_13274 | CRMP-1 | 45.2  | 15   | 17   | 5   | I T G M V V A A V A A V G I I A G V S I F Y A | KRPKKYSFQHSMAK                                                    |
| SS50377_13872 | CRMP-1 | 34.5  | 15   | 19   | 2   | V T G I V I A V L V V A G V G G L A Y Y F     | IKRACK                                                            |
| SS50377_13874 | CRMP-1 | 68.1  | 15   | 38   | 5   | I A G I V G G I L V V I G V V S V G L A V Y L | KKQKKQKKFN S I P T S D N N V E P L S N V L W                      |
| SS50377_14561 | CRMP-1 | 139.8 | 15   | 51   | 17  | I A G M V V A A V A A V G I I A G V S I F Y A | KRPKKYSFQHAMIE                                                    |
| SS50377_14697 | CRMP-1 | 34.6  | 15   | 19   | 2   | A G I V I A V L V V V G A V G G L A Y Y F I   | KRAKK                                                             |
| SS50377_14705 | CRMP-1 | 34.4  | 15   | 19   | 2   | V T G I V I A V L V V V G A V G G L A Y Y F   | TKKAKK                                                            |
| SS50377_15964 | CRMP-1 | 47.6  | 15   | 26   | 0   | I I G I V V A V I I L T I C V V A G L T I F I | IKRKKKSVVAKSDLVNSNTRSQINRSM SWNSKI Q                              |
| SS50377_15974 | CRMP-1 | 44.3  | 15   | 15   | 5   | I I G M V F A L I I I I C G I L G I I Y Y V   | RRPKRHTFQHSMAR                                                    |
| SS50377_16904 | CRMP-1 | 34.5  | 15   | 19   | 2   | A G I V I A V L V V V G A V G G L A Y Y F I   | KKGKK                                                             |
| SS50377_17084 | CRMP-1 | 34.7  | 15   | 16   | 2   | A G I V I A V L V V V G V G G L A Y Y F V     | KKAKK                                                             |
| SS50377_17101 | CRMP-1 | 34.9  | 15   | 16   | 2   | I T G I V I A V L V V V G A V G G L A Y Y F   | IKKSKK                                                            |
| SS50377_17215 | CRMP-1 | 47.7  | 15   | 26   | 0   | I I G I V V A V I I L T I C V V A G L T I F I | IKRKKKT V V V A K Q D L V K N N S R T Y I N G S M S Q N G S K I Q |
| SS50377_17480 | CRMP-1 | 29.8  | 15   | 16   | 2   | V T G I V I S V L V V V G A V G G L A Y Y F   | IKKGKK                                                            |
| SS50377_17503 | CRMP-1 | 77.8  | 15   | 45   | 6   | I A G I V G G I L V V I G V V S V G L A V Y L | KKQKKQKKFN S I P T S D N N V E P L S N V L W                      |
| SS50377_17515 | CRMP-1 | 61.1  | 15   | 27   | 4   | I A G I V I A M M V L I G G I G C V V Y Y L   | MKRYKK                                                            |
| SS50377_17647 | CRMP-1 | 38.2  | 15   | 19   | 3   | A G I V V A V L V V A G A V G G L A F Y F I   | KRARK                                                             |
| SS50377_18013 | CRMP-1 | 77.6  | 15   | 45   | 6   | I A G I V G G I L V V I G V V S V G L A V Y L | KKQKKQKKFN S I P T S D N N V E P L S N V L W                      |
| SS50377_18027 | CRMP-1 | 47.8  | 15   | 26   | 0   | I I G I V V A A I I L T I C V V A G L T I F I | IKRKKKT V V V A K Q D L V K N N S R S Q I N R S M S W N S K I Q   |

| ID            | Group  | MW   | Cys% | CXXC | CXC | Transmembrane             | C-terminal sequence |
|---------------|--------|------|------|------|-----|---------------------------|---------------------|
| SS50377_18092 | CRMP-1 | 34.5 | 15   | 19   | 2   | VTGIVIAVLVVVGAVGGGLAYYF   | IKKGKK              |
| SS50377_18124 | CRMP-1 | 36.6 | 15   | 16   | 2   | TAITIAALVVVCGVNCILLYFL    | KKARKQQLK           |
| SS50377_18125 | CRMP-1 | 37.9 | 15   | 19   | 2   | AGIVIAVLVVVGAVGGGLAYYFI   | KRARK               |
| SS50377_10050 | CRMP-1 | 31.0 | 14   | 12   | 2   | IVGIIVGVVAVIGAVGGGLAYYF   | IKKGKK              |
| SS50377_10881 | CRMP-1 | 32.1 | 14   | 16   | 2   | TGIVIGVLALVGAIGGGVAFYFI   | KKSKR               |
| SS50377_11422 | CRMP-1 | 29.2 | 14   | 12   | 2   | IVGIVVGVVVVGAIGGGGLAYYF   | IRKAKK              |
| SS50377_11595 | CRMP-1 | 30.7 | 14   | 12   | 2   | VAGIVIAVLVVVGAVGGGLAYYF   | IKKAKK              |
| SS50377_11940 | CRMP-1 | 49.2 | 14   | 16   | 3   | NYLGPAAAVVIFTVCIGVVLVYFV  | QKRVRKNTKVTATAIN    |
| SS50377_12525 | CRMP-1 | 30.0 | 14   | 12   | 2   | VGIVIGALVIVGVVGGGLAYYFI   | RKARK               |
| SS50377_13209 | CRMP-1 | 54.5 | 14   | 18   | 4   | YLGAAAAIGILTFSVGAVAYIAV   | KKARKAAGVAATAIN     |
| SS50377_13230 | CRMP-1 | 32.3 | 14   | 13   | 2   | AGIVIAVLVVVGAVGGGIAYYFI   | KKSKK               |
| SS50377_13289 | CRMP-1 | 30.7 | 14   | 12   | 2   | AGIVVAVLIVVGVVGGGLAYYFV   | KKAKK               |
| SS50377_15471 | CRMP-1 | 31.2 | 14   | 12   | 2   | IAGIVIGIVAVVGVVCGVAYYL    | VRRAKLLVSEAQ        |
| SS50377_15526 | CRMP-1 | 30.3 | 14   | 12   | 2   | IAGIVIAVLVVVGVVGGGLAFYF   | IKKAKK              |
| SS50377_15819 | CRMP-1 | 29.7 | 14   | 12   | 2   | IVGIVVGVLAVVGAVGSCLAFYL   | IKKAKK              |
| SS50377_16083 | CRMP-1 | 31.0 | 14   | 12   | 2   | IVGIIVGVVAVIGAVGGGLAYYF   | IKKGKK              |
| SS50377_16398 | CRMP-1 | 29.8 | 14   | 12   | 2   | AGII IATLVVVVGAVGGGLAYYFI | RKSKK               |
| SS50377_16474 | CRMP-1 | 29.9 | 14   | 12   | 2   | AGII IGTLVVVAIIGGLAYYFI   | RKSRK               |
| SS50377_17112 | CRMP-1 | 32.3 | 14   | 13   | 2   | AGIVIAVLVVVGAVGGGIAYYFI   | KKSKK               |
| SS50377_17164 | CRMP-1 | 29.7 | 14   | 12   | 2   | IAGIIIGVLVVGAVIIGGGGLAYYF | IKKARK              |
| SS50377_17168 | CRMP-1 | 30.8 | 14   | 12   | 2   | AGIVVAVLIVVGVVGGGLAYYFV   | KKAKK               |
| SS50377_17501 | CRMP-1 | 30.4 | 14   | 12   | 2   | ITGIVIGGLAVISAAAGGLAYYI   | IRKAKK              |
| SS50377_17602 | CRMP-1 | 33.5 | 14   | 13   | 2   | AGIVLGAVVVVGAVGGGLAYYFI   | KKAKK               |
| SS50377_17619 | CRMP-1 | 29.7 | 14   | 12   | 2   | IAGIIIGVLVVGAVIIGGGGLAYYF | IKKARK              |
| SS50377_17626 | CRMP-1 | 30.5 | 14   | 12   | 2   | AGIVVTVLIVVGVVGGGLAYYFV   | KKAKK               |
| SS50377_17632 | CRMP-1 | 29.8 | 14   | 12   | 2   | IAGIIIGVLVVGAVGGGLAYYF    | IKKARK              |
| SS50377_17757 | CRMP-1 | 30.1 | 14   | 12   | 2   | IAGIIIGVLAVASAVGGGLAYYF   | IKKARK              |
| SS50377_17799 | CRMP-1 | 32.3 | 14   | 16   | 2   | IAGIVVAVLVVLGALGGGLAFYL   | IKRSKK              |
| SS50377_17996 | CRMP-1 | 29.9 | 14   | 12   | 2   | IAGIIIGVLVVGAVGGGLAYYF    | IKKARK              |
| SS50377_18046 | CRMP-1 | 29.8 | 14   | 12   | 2   | IAGIIIGVLVVGAVGGGLAYYF    | IKKARK              |
| SS50377_18052 | CRMP-1 | 30.8 | 14   | 12   | 2   | AGIVVAVLIVVGVVGGGLAYYFV   | KKAKK               |
| SS50377_18100 | CRMP-1 | 30.2 | 14   | 12   | 2   | ITGIVIGGLAVISAAAGGLGYF    | IRKAKK              |
| SS50377_18116 | CRMP-1 | 33.0 | 14   | 13   | 2   | AGIVIAVLVVTGAVGGGLAYYFI   | KKGKK               |
| SS50377_18126 | CRMP-1 | 32.7 | 14   | 13   | 2   | AGIVIAVLVVVGAVGGGLAYYFV   | KKGKK               |
| SS50377_18841 | CRMP-1 | 30.0 | 14   | 12   | 2   | IVGIVVGVVVVGVAVAGGLAYYF   | VRRAKKRVEQQ         |

| ID            | Group  | MW   | Cys% | CXXC | CXC | Transmembrane             | C-terminal sequence              |
|---------------|--------|------|------|------|-----|---------------------------|----------------------------------|
| SS50377_18844 | CRMP-1 | 29.4 | 14   | 12   | 2   | IVGIVVGVLA VVVA VGGGLAYYF | IRKGKK                           |
| SS50377_18845 | CRMP-1 | 25.5 | 14   | 11   | 2   | IVGIVVGVLVVVGAVG SGLAYYF  | IRKAKK                           |
| SS50377_18884 | CRMP-1 | 29.3 | 14   | 12   | 2   | IVGIVVGVLVVVGAVG GGLAYYF  | VRRAKK                           |
| SS50377_18917 | CRMP-1 | 30.0 | 14   | 12   | 2   | IVGIVVGVLA VVVA VGGCLAYYF | VRRGKK                           |
| SS50377_18918 | CRMP-1 | 29.4 | 14   | 12   | 2   | IVGIVVGVLVVVGAVG GGLAYYF  | IRKAKK                           |
| SS50377_18919 | CRMP-1 | 29.6 | 14   | 12   | 2   | IVGIVVGVLVVVGAI G GGLAYYF | IRKAKK                           |
| SS50377_18923 | CRMP-1 | 30.0 | 14   | 12   | 2   | IVGIVVGVLVVVGAI G GGLAYYF | VRKAKKRVEQQ                      |
| SS50377_18952 | CRMP-1 | 29.6 | 14   | 12   | 2   | LVVVGGVVDGLAYYFVRKGKK     |                                  |
| SS50377_18965 | CRMP-1 | 30.5 | 14   | 12   | 2   | IVGIVVGVLVVVGAVG GGLAYYF  | IRKAKKRVEQQ                      |
| SS50377_18966 | CRMP-1 | 29.6 | 14   | 12   | 2   | VLVVGAVG GGLAYYFVRRAKK    |                                  |
| SS50377_12053 | CRMP-1 | 30.1 | 13   | 9    | 2   | ITGVIIIGILSVILLEGCIIYFFI  | KKTKK                            |
| SS50377_12088 | CRMP-1 | 41.9 | 13   | 13   | 4   | YLGVIAAVLALISVCITAYIVV    | KKARKSPGVVAISIY                  |
| SS50377_12553 | CRMP-1 | 22.3 | 13   | 7    | 2   | IAGMVVA AVAAVGI IAGVSIFYA | KRPKKYSFQHSMAK                   |
| SS50377_12636 | CRMP-1 | 32.5 | 13   | 12   | 2   | AGIVIAVLVVVGAVGGGIAYYFI   | KKSKK                            |
| SS50377_12864 | CRMP-1 | 41.9 | 13   | 13   | 4   | YLGVIAAVLALISVCITAYIVV    | KKARKSPGVVAISIY                  |
| SS50377_13120 | CRMP-1 | 31.7 | 13   | 12   | 2   | FGIIFSVLAVIGGLGIGIALFLI   | KRGKKVCPDVGVTNNLE                |
| SS50377_jh058 | CRMP-1 | 29.1 | 13   | 12   | 1   | IAGIVIGVLA VAVGGLGWFLV    | SRKGRKAPVGRPKW                   |
| SS50377_15453 | CRMP-1 | 22.6 | 13   | 8    | 1   | IVGII VGVVAVIGAVGGGLAYYF  | IKKGKK                           |
| SS50377_15539 | CRMP-1 | 31.8 | 13   | 12   | 2   | IAGII IAVLVVIGAVIGLIILLL  | RKNKKTQPI SGVKRDLI               |
| SS50377_ja015 | CRMP-1 | 29.1 | 13   | 12   | 1   | IAGIVIGVLA VAVGGLGWFLV    | SRKGRKAPVGRPKW                   |
| SS50377_17965 | CRMP-1 | 22.3 | 13   | 7    | 2   | ITGMVVA AVAAVGI IAGVSIFYA | KRPKKYSFQHSMAK                   |
| SS50377_18031 | CRMP-1 | 30.6 | 13   | 12   | 1   | AGIVVAALIVVGVVGGGLAYYFV   | KKAKK                            |
| SS50377_18882 | CRMP-1 | 31.3 | 13   | 11   | 2   | AGIVIGVLLVVGAVGGGLTYFV    | RRAKK                            |
| SS50377_18907 | CRMP-1 | 29.8 | 13   | 11   | 2   | IVGIVISVLVVVGAVGGGLTYF    | IRKGKK                           |
| SS50377_13212 | CRMP-1 | 34.0 | 12   | 8    | 2   | SIGII VSIAVLTICIGVVAYNFA  | KKDRKAPRVPGMTIN                  |
| SS50377_16406 | CRMP-1 | 34.7 | 12   | 12   | 1   | IIAAITIGCLLFICSTVGIILYY   | MKRSKKNQQAVFIEKKLAPAFIFNTDQIMTNK |
| SS50377_17372 | CRMP-1 | 17.4 | 12   | 4    | 2   | VAGILVAVLVVVGAVGGGLAFYF   | IKKGKK                           |
| SS50377_17639 | CRMP-1 | 34.1 | 12   | 10   | 2   | AISGIIIGALAVVGAISGTVIVI   | MRKSRKNQVSTDTGAVNILE             |
| SS50377_17646 | CRMP-1 | 37.0 | 12   | 13   | 1   | LSQPLVIIICGVGNCILLYFL     | KKARKQQLK                        |
| SS50377_18971 | CRMP-1 | 34.0 | 12   | 10   | 2   | AIAGIIIGALAVVGAISGTVIVI   | MRKSRKNQVSTDTGAVNILE             |
| SS50377_10079 | CRMP-1 | 32.5 | 11   | 9    | 2   | IVGIVLVGVVA AVVGGGLAYYF   | VKHKKAAGGSATQVQVE                |
| SS50377_11341 | CRMP-1 | 21.8 | 11   | 6    | 1   | TGIVIGVILVVGAVAGGLAYYFI   | KRGKK                            |
| SS50377_11344 | CRMP-1 | 22.0 | 11   | 6    | 1   | ITGIVIGAVVVVGAVAGGLAYYF   | IKRGKK                           |
| SS50377_11556 | CRMP-1 | 32.4 | 11   | 9    | 2   | AGIVIAVLAVVVGAVGGGLAYYFV  | KRARK                            |
| SS50377_12850 | CRMP-1 | 71.5 | 11   | 19   | 4   | YLGAAAAIGILTF SVGAVAYIAV  | KKARKAAGVAATAIN                  |

| ID            | Group  | MW    | Cys% | CXXC | CXC | Transmembrane            | C-terminal sequence                       |
|---------------|--------|-------|------|------|-----|--------------------------|-------------------------------------------|
| SS50377_17512 | CRMP-1 | 16.3  | 11   | 6    | 1   | AGIVIAVLVVVGAVGGGLAYYFI  | KKGKK                                     |
| SS50377_17746 | CRMP-1 | 18.0  | 11   | 4    | 2   | VTGIMIAVLIVVGAVGGGLVYF   | IKRAKK                                    |
| SS50377_17777 | CRMP-1 | 21.5  | 11   | 6    | 1   | VGIVIGALVAVGAIGGGLAFYFI  | RRSKK                                     |
| SS50377_18852 | CRMP-1 | 27.3  | 11   | 8    | 1   | AGILIGVLLVVGAVVGGGLAYYFV | RRAKKRVEQQ                                |
| SS50377_18861 | CRMP-1 | 26.8  | 11   | 8    | 1   | AGIVVGVLLIVIGAVGGGLAYYFV | RRQKK                                     |
| SS50377_18908 | CRMP-1 | 37.7  | 11   | 12   | 2   | AGIVIGVLLVVGAVGGGLTYFV   | RRAKK                                     |
| SS50377_18922 | CRMP-1 | 26.7  | 11   | 8    | 1   | AGIVIGVLLVVGAVGGGLAYYFV  | RRGKK                                     |
| SS50377_18953 | CRMP-1 | 26.8  | 11   | 8    | 1   | AGIVIGVLLVVGAVGGGLTYFV   | RRAKK                                     |
| SS50377_18967 | CRMP-1 | 18.4  | 11   | 6    | 1   | TGIVIGVLLVVGAVGGGLAYYFV  | RRGKK                                     |
| SS50377_18975 | CRMP-1 | 36.5  | 11   | 12   | 2   | TGIVIGVLLVVGAVGGGLAYYFI  | RKAKKRVEQQ                                |
| SS50377_18999 | CRMP-1 | 37.4  | 11   | 12   | 2   | TGIVIGVLLVVGAVGGGLAYYFI  | RKAKKRVEQQ                                |
| SS50377_10017 | CRMP-1 | 23.0  | 10   | 6    | 1   | TGIVIGVILVVGAVAGGLAYYFI  | KRGKK                                     |
| SS50377_10032 | CRMP-1 | 22.8  | 10   | 6    | 1   | TGIVIGVILVVGAVAGGLAYYFI  | KRGKK                                     |
| SS50377_10639 | CRMP-1 | 23.6  | 10   | 6    | 1   | TGIVVGVVLLVVGAVAGGLAYYFI | KKGKK                                     |
| SS50377_10643 | CRMP-1 | 23.6  | 10   | 6    | 1   | TGIVVGVVLLVVGAVAGGLAYYFI | KKGKK                                     |
| SS50377_12258 | CRMP-1 | 25.1  | 10   | 6    | 1   | VGIVIGALVAVGAIGGGLAFYFI  | RRSKK                                     |
| SS50377_17609 | CRMP-1 | 57.0  | 10   | 12   | 2   | IAGIIIGVLLVVGAVGGGLAYYF  | IKKARK                                    |
| SS50377_17890 | CRMP-1 | 15.4  | 10   | 3    | 1   | IAGIVIASLVVVGIVGGGLAYYF  | IKKLLR                                    |
| SS50377_18017 | CRMP-1 | 13.0  | 10   | 3    | 1   | VTGIVIAVLVVVGAVGGGLAYYF  | IKKAKK                                    |
| SS50377_12257 | CRMP-1 | 23.9  | 9    | 6    | 1   | VGIVIGALVAVGAIGGGLAFYFI  | RRSKK                                     |
| SS50377_18957 | CRMP-1 | 22.6  | 9    | 6    | 1   | TGIVIGVLLVVGAVGGGLAYYFI  | RKAKKRVEQQ                                |
| SS50377_10064 | CRMP-1 | 16.6  | 7    | 3    | 1   | VGIVLGVVAVAAVVGGGLAYYFV  | KKHKAAGGSATQVQVE                          |
| SS50377_12645 | CRMP-1 | 31.9  | 7    | 4    | 2   | AGIVIAVLVVVGAVGGGIAYYFI  | KKSKK                                     |
| SS50377_10028 | CRMP-2 | 8.7   | 23   | 2    | 4   | AVLCAGICFDLVIWGWIAIIIV   | GVMKMC                                    |
| SS50377_11351 | CRMP-2 | 9.7   | 17   | 3    | 2   | AGASMFFTCFIFGWIVAIIVGV   | KMMCPG                                    |
| SS50377_11945 | CRMP-2 | 69.7  | 17   | 40   | 0   | IIIVVVCILVLCITAGVIYYIV   | KHKKQARSTKSKALHNIQQDLN                    |
| SS50377_14690 | CRMP-2 | 116.1 | 17   | 77   | 9   | IAGIVIAVLVVIGLVAGGAFWYV  | KRSKHTPAEIGLVDRRLQ                        |
| SS50377_15174 | CRMP-2 | 90.5  | 17   | 52   | 0   | AIVGILVGVLLVSVLAGLVVY    | SILKKKKANATVLEQDNVQLATVPVYDGMGNGGTLVKQGFV |
| SS50377_16496 | CRMP-2 | 89.7  | 17   | 52   | 0   | AIVGIVVGVVLAVGLAGLVY     | AMSKKKKANVTVIEENSLQPASVSVFAVNSNGGTLVK     |
| SS50377_17603 | CRMP-2 | 65.6  | 17   | 40   | 3   | AVTGIIIAVLLVVGAVAGVFWC   | MKSKVNSEIETSNSNIK                         |
| SS50377_17697 | CRMP-2 | 108.4 | 17   | 55   | 5   | WQILLSIIIVCAILVGIWVIVY   | FKKKLNLKQDSYMIFPNAEN                      |
| SS50377_10984 | CRMP-2 | 68.0  | 16   | 40   | 0   | IAGIVAGLVLLVGLIGGAIFAV   | ARKRKAQRSVYGDLEVKKENLQLQVDDNL             |
| SS50377_10986 | CRMP-2 | 45.4  | 16   | 25   | 0   | IAGIVVGLVLLVGLIGGAIFAV   | ARKRQVQCSIQGDLEVKKENIQLQVDDDSLWSKVS       |
| SS50377_11560 | CRMP-2 | 64.1  | 16   | 39   | 4   | AIAGIVIAVLIVASAVGGVFWF   | MRQKKTSVSVESGAGIQE                        |
| SS50377_11939 | CRMP-2 | 67.8  | 16   | 40   | 0   | VIAIIVAVLIVVACVTGGAIFFI  | VKRKRDSGRGLHRMATKRDVAGSQDKVSAFSSD         |

| ID            | Group  | MW    | Cys% | CXXC | CXC | Transmembrane            | C-terminal sequence                   |
|---------------|--------|-------|------|------|-----|--------------------------|---------------------------------------|
| SS50377_11941 | CRMP-2 | 87.3  | 16   | 49   | 9   | IIFIVIGIIGGITLTFGAAVFVI  | IARKRKSINVNPDYDTLLNQSNSSQLF           |
| SS50377_12594 | CRMP-2 | 63.2  | 16   | 34   | 6   | IGIIAGIILLILLIILGITFAVV  | KYRKRKEKLLKNDLSMLVRKETSSSQLLL         |
| SS50377_13016 | CRMP-2 | 85.4  | 16   | 46   | 10  | QIIYIVLGVLAGVCLIIIGIVIVV | KIVKKRKSIIKSDEYNSAELLTRNNSSQIY        |
| SS50377_13303 | CRMP-2 | 64.5  | 16   | 39   | 0   | WLLTAVISVIVACIVGGVAYLVV  | KMGKKNALRMGIQKDLYEENSGIRTQQPQE        |
| SS50377_13319 | CRMP-2 | 71.1  | 16   | 35   | 6   | VISVSIQVVAIIIIIVVAIVIIL  | NRAYRNKKYSVNDNSNHKLFKKAKTQVLKTACDNLCP |
| SS50377_14685 | CRMP-2 | 105.8 | 16   | 67   | 8   | IAGIVIAVLVVIGLVAGGAFWYV  | KRSKHTPAEIGLVDRRLQ                    |
| SS50377_14694 | CRMP-2 | 98.4  | 16   | 56   | 7   | TVAGIVIAVLAVVGGVAGGVFWY  | MKKSKTNQDIERLNFILK                    |
| SS50377_14702 | CRMP-2 | 56.1  | 16   | 33   | 0   | IIGIIVGIIAVVGVIGGVVYAV   | QMKKSNLVQKNSNVKPNKQNIQFQIDESVKILTKTE  |
| SS50377_14714 | CRMP-2 | 75.6  | 16   | 47   | 4   | AIAGIIIAVLVVVGGVAGGVFWY  | MKKTKVNQETEKQNFSRQ                    |
| SS50377_15353 | CRMP-2 | 51.2  | 16   | 33   | 0   | IVGIVVGVVAAIGLVAGAGAYFI  | VKKRKQAVVSPPKDDEIKHANLQMLQEONIILQKRQQ |
| SS50377_15666 | CRMP-2 | 51.0  | 16   | 33   | 0   | IVGIVVGVVAAIGLVAGAGAYFI  | VKKRKQAVVSPPKDDEIKHANLQMLQEONIILQKRQQ |
| SS50377_15947 | CRMP-2 | 82.9  | 16   | 46   | 8   | IGLGAVLGLALAAVAIVLVIWAV  | KKRKARANKDYDTDVVGVRISSSSSQLF          |
| SS50377_15963 | CRMP-2 | 78.5  | 16   | 42   | 7   | IAGVIVAVLLVIGGLCVGGFFLA  | RRCVGRNLGNAEPLKIDNTVW                 |
| SS50377_15971 | CRMP-2 | 117.5 | 16   | 42   | 14  | IVCLLIALIIIGGVWIIIVYHYL  | SKPKKYYQQHNILAAQNQQ                   |
| SS50377_16105 | CRMP-2 | 115.7 | 16   | 42   | 14  | WDVVGCAAGATIVAVGYLIYY    | YTHRPKKFYTQHNMFSSK                    |
| SS50377_16470 | CRMP-2 | 89.5  | 16   | 52   | 0   | AIVGIVVGVVAVGLVAGLGLAYY  | AMSKKKKANVTVIEENSLQPASVSVFAVNSNGGTLVK |
| SS50377_16581 | CRMP-2 | 61.4  | 16   | 34   | 6   | IIGIIVGIVAGLVIVCVIIVIVV  | KKSSKHKMPKRDNDVLIQRTDSNSQLIV          |
| SS50377_16894 | CRMP-2 | 63.9  | 16   | 39   | 4   | AIAGIVIAVLIVAGAIGGGVFWF  | MRQKKKASVCEGSAGIQE                    |
| SS50377_17167 | CRMP-2 | 73.7  | 16   | 46   | 5   | AVAGIVIAVLVVAGGVAGAAFWY  | MKKSKANQKVEKQNFNMQ                    |
| SS50377_17171 | CRMP-2 | 77.9  | 16   | 49   | 6   | AVAGIVIAVLVVAGGVAGAAFWY  | MKKSKANQKVEKQNFNMQ                    |
| SS50377_17182 | CRMP-2 | 66.2  | 16   | 40   | 3   | AVAGIIIAVLLVGGVAGGVFWC   | MKKSKVNSEIETSKSNIK                    |
| SS50377_17377 | CRMP-2 | 57.0  | 16   | 32   | 0   | IGIVVGIIAVVGVIGGVVYAVL   | MKKKSNLVQKNNNVKPNKQNVYQRIDESATILGKAQ  |
| SS50377_17486 | CRMP-2 | 56.7  | 16   | 32   | 0   | MIGIVVGIIAVVGVIGGVVYAV   | QMKKSNLVQKNSNVKPNKQNIQFQIDESVRILTKTE  |
| SS50377_17489 | CRMP-2 | 71.7  | 16   | 38   | 5   | AVAGIVIAVLVVVGGVAGGVFWY  | MKKTKVNQEIIEKQNFSRQ                   |
| SS50377_17491 | CRMP-2 | 63.7  | 16   | 39   | 4   | AIAGIVIAVLIVAGAIGGGVFWF  | MRQKKKTSVSVESGSAGIQE                  |
| SS50377_17598 | CRMP-2 | 59.0  | 16   | 35   | 4   | AVTGIIIAVLLVGGVAGGIFWY   | MKKSKLNQEIDEQKQFVLK                   |
| SS50377_17623 | CRMP-2 | 73.6  | 16   | 46   | 5   | AVAGIVIAVLVVAGGVAGAAFWY  | MKKSKANQKVEKQNFNMQ                    |
| SS50377_17627 | CRMP-2 | 73.3  | 16   | 46   | 5   | AVAGIVIAVLVVAGGVAGAAFWY  | MKKSKANQKVEKQNFNMQ                    |
| SS50377_17750 | CRMP-2 | 59.8  | 16   | 35   | 4   | AVTGIIIAVLLVAGGVAGGIFWY  | MKKSKLNQEIDEQKQFVLK                   |
| SS50377_17988 | CRMP-2 | 61.1  | 16   | 36   | 4   | AVTGIIIAVLLVAGGVAGGIFWY  | MKKSKLNQEIDEQKQFVLK                   |
| SS50377_18009 | CRMP-2 | 56.7  | 16   | 32   | 0   | IGIVVGIIAIVGVIGGVVYAVL   | MKKKSNFVQKNNDATTNKQNIQYQIVESATMLGQTKQ |
| SS50377_18033 | CRMP-2 | 82.1  | 16   | 52   | 6   | AVAGIVIAVLVVAGGVAGAAFWY  | MKKSKANQKVEKQNFNMQ                    |
| SS50377_18050 | CRMP-2 | 74.5  | 16   | 46   | 6   | AVAGIVIAVLVVAGGVAGAAFWY  | MKKSKANQKVEKQNFNMQ                    |
| SS50377_18057 | CRMP-2 | 55.0  | 16   | 32   | 3   | AIAGIVIAVLIVAGAIGGGVFWF  | MREKKKTSVCEGSAGIQE                    |

| ID            | Group  | MW    | Cys% | CXXC | CXC | Transmembrane             | C-terminal sequence                                     |
|---------------|--------|-------|------|------|-----|---------------------------|---------------------------------------------------------|
| SS50377_18076 | CRMP-2 | 56.6  | 16   | 32   | 0   | IIGIVVGIIVVGGVIVVGGVYAV   | QMKKKSNLVQKNSNVKPNKQNIQFQIDESVRILTQTE                   |
| SS50377_18081 | CRMP-2 | 83.9  | 16   | 52   | 6   | VAGISLAVIAVVLGASGGVFWYL   | RRAKIAKRKTVMKWRQQ                                       |
| SS50377_18085 | CRMP-2 | 82.8  | 16   | 53   | 6   | AITGIVITVLIIGAI CFGIFWY   | MKKVKITKPLVESGVAIQ                                      |
| SS50377_18089 | CRMP-2 | 56.3  | 16   | 33   | 0   | IGIAVGGIIVVGGVIVVGGVYAVL  | MKKKSNLVQKNNNVKHNKQNVYQRIDESATILGKAQ                    |
| SS50377_18096 | CRMP-2 | 96.2  | 16   | 60   | 7   | ITGIVIAVLLVGLIAGGAFWYV    | KRSKHTYSDIGLVGRLQQ                                      |
| SS50377_10023 | CRMP-2 | 50.1  | 15   | 25   | 5   | YIVVGVIAGLTVIMSIVITVLI    | KRRKISNKQQFERSLLEKANNSSNQVF                             |
| SS50377_10070 | CRMP-2 | 60.3  | 15   | 34   | 0   | AMVGIIICLLVIVGGVGTAFI     | TQKRKRSVGNMNHVDILSNNEITIQGLQNVVDQKSILNSIKE              |
| SS50377_10747 | CRMP-2 | 38.9  | 15   | 19   | 2   | GIIGIVIAILVAVGVGGVVGCC    | MRKKKHTAVVADAETVVAGQQ                                   |
| SS50377_10751 | CRMP-2 | 51.8  | 15   | 23   | 4   | GLSAGVIVGIAVAVVGIYRSGCW   | SRYRCLRCCKEARASSDRAGNCYNRRLTIYFTAVNQCAFQKWCPLPKFNCSVTIT |
| SS50377_12054 | CRMP-2 | 86.4  | 15   | 28   | 9   | IVGLVFAGLIILTIVCLIVYQYL   | AKPKKYYQQHNLKALQNNQ                                     |
| SS50377_12837 | CRMP-2 | 52.3  | 15   | 21   | 7   | AIVGIVLGLVGLVGLVILIVV     | MKKRAARGNGQDIQEELVVDISKYYSQFSEVSIASMIE                  |
| SS50377_12885 | CRMP-2 | 70.2  | 15   | 21   | 7   | EIAGIALAVLCGALLVVVVVAV    | KCSARKRQSGPWK                                           |
| SS50377_13121 | CRMP-2 | 84.9  | 15   | 36   | 6   | IQITAILSVVAIVIVIGSTITL    | IQYKRRITRVAKVETYYN                                      |
| SS50377_13277 | CRMP-2 | 38.9  | 15   | 19   | 2   | GIIGIVIAILVAVGVGGVVGCC    | MRKKKHTAVVADAETVVAGQQ                                   |
| SS50377_13717 | CRMP-2 | 115.4 | 15   | 41   | 13  | WDVVGCAAGATIVAIVGYLIYY    | YTHRPKKFYTQHNMFSSK                                      |
| SS50377_14187 | CRMP-2 | 38.9  | 15   | 19   | 2   | GIIGIVIAILVAVGVGGVVGCC    | MRKKKHTAVVADAETVVAGQQ                                   |
| SS50377_14533 | CRMP-2 | 59.2  | 15   | 29   | 4   | TIAGIVIAVLLVVGAGVIFWYI    | KKSKVNQEIEMPKNIK                                        |
| SS50377_14537 | CRMP-2 | 41.2  | 15   | 21   | 1   | VAGIVIAIIVIGGIGGGVFWYL    | KKSKTQLKNVSVGGVMQE                                      |
| SS50377_14594 | CRMP-2 | 55.4  | 15   | 30   | 5   | ITGIVITVLIILGLISGGVFWFI   | KKSKSEQYAIKDEVIVNQI                                     |
| SS50377_14605 | CRMP-2 | 43.0  | 15   | 21   | 3   | GAGISAIVFACLWVIGGIAYGIF   | RYKFKCKIERAFISGKPEKIE                                   |
| SS50377_15967 | CRMP-2 | 48.2  | 15   | 22   | 0   | AIVGTIAGMLLVSVLAGLVVY     | SIKKKKVGGAPVLEQDNVKLATVPMYAGIGNGGTLVK                   |
| SS50377_16110 | CRMP-2 | 122.5 | 15   | 42   | 9   | IAGVIVGVGIGIVAMAAISIWCL   | CKNGSRKARFVDQGLMQGENGSQVAIVD                            |
| SS50377_ja020 | CRMP-2 | 42.1  | 15   | 21   | 5   | ITGIFVGLVAVIAITILVVVLIL   | KSMRNKKKAPQLDLPVQRMTGTPHADMS                            |
| SS50377_16896 | CRMP-2 | 62.0  | 15   | 30   | 4   | AVAGIVIAVLIIVGGVAGGAFWY   | MKSKVNQEI EKQNF SRQ                                     |
| SS50377_16901 | CRMP-2 | 50.5  | 15   | 29   | 0   | IGIVVGIIVALVGVIVGVVYAVL   | MKKKSNFIQKNNDATTNKQNIQYQIVESATMLEQTKQ                   |
| SS50377_17196 | CRMP-2 | 140.2 | 15   | 51   | 8   | GIAGIVIALI AVL LVVILTVILV | KRRKSNAKRAQYVDQGLDRNGSQVAIVE                            |
| SS50377_18072 | CRMP-2 | 32.7  | 15   | 13   | 2   | VFNILLGTLVALCI IWGMLDIIL  | CKKIKNKKQ                                               |
| SS50377_18086 | CRMP-2 | 32.4  | 15   | 13   | 2   | VFNILLGTLVALCI IWGMLDIIL  | CKKIKNKKQ                                               |
| SS50377_18105 | CRMP-2 | 61.3  | 15   | 36   | 4   | AIAGIVIAIVVVAIIGGGVFWY    | MKSKASSTTTRSNAAMQ                                       |
| SS50377_19076 | CRMP-2 | 52.4  | 15   | 26   | 6   | ITGLIIGAFILIVTVVIVIGFV    | RRSNEIKYSVYKIKAQQRAELEKSIVENNDE                         |
| SS50377_10265 | CRMP-2 | 72.3  | 14   | 22   | 6   | DILSILFGLVLAIIIVVFGVWF    | KKCNRSKRQDMVDNRNIFI                                     |
| SS50377_10641 | CRMP-2 | 32.6  | 14   | 12   | 2   | AIAGIIGVLIIVVGLCFATFWF    | MKKKVSTAPVQVRNDFE                                       |
| SS50377_11709 | CRMP-2 | 62.9  | 14   | 18   | 6   | MEIAGIALAVLCGALLVVVVVAV   | KCSARKRQSEPWK                                           |
| SS50377_11828 | CRMP-2 | 31.4  | 14   | 12   | 2   | GAIAGIVIAVLLVAVGAVGVWF    | MMKKKRCIGSAGTRHGRK                                      |

| ID            | Group  | MW   | Cys% | CXXC | CXC | Transmembrane            | C-terminal sequence                                    |
|---------------|--------|------|------|------|-----|--------------------------|--------------------------------------------------------|
| SS50377_11948 | CRMP-2 | 30.0 | 14   | 12   | 2   | ITGIIVAILIVVGGLCVGTFLFL  | KKRANSAPVKIINNIE                                       |
| SS50377_12075 | CRMP-2 | 58.1 | 14   | 21   | 4   | AIGVIFTLVVLTGSGVAILYAIL  | KKRNKAAVAVDTATN                                        |
| SS50377_12085 | CRMP-2 | 10.5 | 14   | 2    | 2   | AGLYMFLFAPLLVWGLSVVVG    | RMMLQ                                                  |
| SS50377_12213 | CRMP-2 | 31.6 | 14   | 12   | 2   | IGIVMAILCGVLGVLGVMVFLYF  | QKKKGLVGEQYHQ                                          |
| SS50377_12582 | CRMP-2 | 58.1 | 14   | 21   | 4   | AIGVIFTLVVLTGSGVAILYAIL  | KKRNKAAVAVDTATN                                        |
| SS50377_13286 | CRMP-2 | 50.2 | 14   | 23   | 3   | AVAGIVIGVLVVAALAIGCVVYF  | RMKRPAATPLELSHQTD                                      |
| SS50377_14141 | CRMP-2 | 61.4 | 14   | 31   | 0   | IAGIVVGLVLLVGLIGGAIFAV   | ARKRKAQRSVQGDLEVKKENLQLQVDDDSLWSKVS                    |
| SS50377_14189 | CRMP-2 | 47.0 | 14   | 22   | 3   | GEVAGIVIGVLVVGVISGVVVF   | QMKKKHSTVLTSEKVAHQND                                   |
| SS50377_14193 | CRMP-2 | 43.2 | 14   | 19   | 4   | AIIGIVVVVILIVCACIGAVMVY  | KKRKLEKAETPLNVSELSN                                    |
| SS50377_14386 | CRMP-2 | 65.3 | 14   | 29   | 0   | MIIGIVSVVGLVLLSFLIAFFV   | CKRVLLVKVQQNVETIKVENIDSNAIQIGIQ                        |
| SS50377_14590 | CRMP-2 | 44.1 | 14   | 13   | 4   | VIGCSIAIAILLAVIVVVLVFLV  | RKMSVKAPT VVRDFHQIQ                                    |
| SS50377_14630 | CRMP-2 | 43.3 | 14   | 20   | 2   | TITNTEFVFLALTAVVVAIVFL   | SMKHHRAQRQRAERIQNHTFQLSNKLANTSFGWG                     |
| SS50377_14699 | CRMP-2 | 34.3 | 14   | 13   | 2   | VFNILGTLVALCIWGLMDIIL    | YKKIKIKSSEEFVILNKQKLSNT                                |
| SS50377_15275 | CRMP-2 | 79.3 | 14   | 40   | 0   | VVGVSIGCIMAILLGIILVW     | KKLQKKIQIPPFASLEYENLVINQ                               |
| SS50377_15292 | CRMP-2 | 30.5 | 14   | 12   | 2   | IAGIIIAIILIGAVGGGLAYYF   | TKRAKS                                                 |
| SS50377_15527 | CRMP-2 | 32.0 | 14   | 12   | 2   | IVTIVVIVMIAAGLIGCGIFILI  | WKNKQTATATGVVKDHFV                                     |
| SS50377_ja042 | CRMP-2 | 45.7 | 14   | 14   | 4   | VLLWQILFGVSVIVLSSGLLCILL | WRYLYNKNINHEKEGQRLIGVQLQEQ                             |
| SS50377_15956 | CRMP-2 | 32.4 | 14   | 12   | 2   | AITGIIIAVIVVGVVCGTFLF    | MKKKVYNVAVEIRNNLK                                      |
| SS50377_16377 | CRMP-2 | 29.3 | 14   | 12   | 2   | IAGIVIGVLAVTGAVGGGLAYYF  | TMRSKYLKLLK                                            |
| SS50377_16381 | CRMP-2 | 44.0 | 14   | 14   | 4   | AVVNRGAGSIAGIAGVVALGVC   | VLAAAAMVVRAVKSRAVAKVERDIAYI                            |
| SS50377_16520 | CRMP-2 | 31.5 | 14   | 12   | 2   | GAIAGIVIAVLVAVAGVAGVWF   | MMKKKRCIGSAGTRHGRK                                     |
| SS50377_17006 | CRMP-2 | 61.3 | 14   | 19   | 6   | WTVAGISIAVFLAIALIALVGL   | WMFGYLRKSQAEAVMEETITETPDVQTGRNNGNLLPPVEAGKDVELGKIALEQK |
| SS50377_17251 | CRMP-2 | 69.8 | 14   | 20   | 6   | VILIGIFGFLACLIIGLVLLI    | KNRVRKPQLLNRMATSADLLDAEYEIGSAAQ                        |
| SS50377_17383 | CRMP-2 | 31.3 | 14   | 16   | 2   | AVTGIIAVLAIVAVGGVAGGIFWY | MKSKLNQEIDEQKFLK                                       |
| SS50377_17538 | CRMP-2 | 40.0 | 14   | 14   | 3   | GGIVGIVIAVVVIGVIGGVVYF   | MKKKNSRRVPDDIQTGFN                                     |
| SS50377_17648 | CRMP-2 | 32.6 | 14   | 13   | 2   | AGIVIAVLVAVGAVGGGLAYYFV  | KKGKQ                                                  |
| SS50377_18270 | CRMP-2 | 73.6 | 14   | 32   | 0   | AAGLGMIVIAVIIIAVVVGAMLV  | RKMRSKAQPEASSGYAIN                                     |
| SS50377_18298 | CRMP-2 | 64.7 | 14   | 28   | 0   | TAGIGLIVITVLILAVMAGVMLV  | RKIRSKAQPEASSGHAIN                                     |
| SS50377_18883 | CRMP-2 | 29.6 | 14   | 12   | 2   | IVGIVIGVLVAVGAVGGGLAYYF  | VRMGKK                                                 |
| SS50377_11190 | CRMP-2 | 13.6 | 13   | 5    | 3   | LAGFVMWLTSSFVVGWVACIVG   | CQICYN                                                 |
| SS50377_12385 | CRMP-2 | 16.6 | 13   | 6    | 2   | IAGIILGTLACICGVGAIVFFVI  | KNKRCKTIP                                              |
| SS50377_12597 | CRMP-2 | 31.1 | 13   | 10   | 2   | VGIIIGVLAVVGAISGIVMVIII  | KSKKNQVK                                               |
| SS50377_12632 | CRMP-2 | 13.3 | 13   | 6    | 3   | VCLSGIVMWLTAQFVVGYVMACI  | VGCKMCYGG                                              |
| SS50377_12857 | CRMP-2 | 60.0 | 13   | 9    | 8   | LIAGIVILLLVIIIIIGGTVYF   | TKKRNISSANSIIIPKDSGIQEMKTTRHSGSLVTENEQYAK              |

| ID            | Group  | MW   | Cys% | CXXC | CXC | Transmembrane            | C-terminal sequence                                                                |
|---------------|--------|------|------|------|-----|--------------------------|------------------------------------------------------------------------------------|
| SS50377_13172 | CRMP-2 | 32.5 | 13   | 12   | 2   | AGIVVGVLVVLGTVGGGLTYFYFI | KKSKTQKFAQMEESTSKQAPE                                                              |
| SS50377_14481 | CRMP-2 | 30.8 | 13   | 12   | 1   | IAGIavgSILVIGIavgTVCYFL  | KRKSrfaQnQtQavkDttMDtVfGGQTVmRSQ                                                   |
| SS50377_14530 | CRMP-2 | 28.6 | 13   | 14   | 2   | AIAGIVIAVLIVAGAIGGGVFWF  | MRQKKKTSVSVVEGSAGIQE                                                               |
| SS50377_15311 | CRMP-2 | 56.9 | 13   | 24   | 4   | WIIGISVTGCLLLCTLIVGLIVW  | FVRRGKIGIYENQMSDATLSRFWLAQSLITVTMRFTISRFSDEIVRIN                                   |
| SS50377_15343 | CRMP-2 | 31.2 | 13   | 10   | 2   | AGIVGVALIVLAVGGGLAYFYFI  | NKQKK                                                                              |
| SS50377_15525 | CRMP-2 | 31.4 | 13   | 11   | 2   | IAGIVIAIFVVVGAISDGLAFYF  | IKKSKTNGMTE                                                                        |
| SS50377_17160 | CRMP-2 | 42.3 | 13   | 15   | 0   | TIGAVLGGVVALTAVIGVVAFAV  | RSRKQRMHTEPPRAEE                                                                   |
| SS50377_17208 | CRMP-2 | 34.7 | 13   | 14   | 1   | GIAGIVIAILAVLLLVTLVVILI  | RRRkStAVRAKLpdGGLLEGHNGSQVAVVD                                                     |
| SS50377_17553 | CRMP-2 | 46.3 | 13   | 16   | 2   | VIIGFFICVILIIITAAIIIFLI  | QKNRLGQYKKIPDGIKTLKKQNCtkLRKGNISSNGNLSTNCVSYLPPETKADDNIWKKTK                       |
| SS50377_17874 | CRMP-2 | 59.6 | 13   | 9    | 8   | LIAGIVIMALIVVALVGLGVYFF  | MKKRNDIPRNSIVMPLRDAPiHRMNSNNSTALVTENPEYAK                                          |
| SS50377_18002 | CRMP-2 | 27.2 | 13   | 10   | 2   | AVVGIVIAVMVVVGGVAGGVFWF  | MKKSKVNQEIEKQNFsRE                                                                 |
| SS50377_18006 | CRMP-2 | 26.8 | 13   | 10   | 2   | VAGIVIAIIIVIGGIGGGVFWYI  | KKSKTQLKNVQGGEVMQE                                                                 |
| SS50377_18008 | CRMP-2 | 41.6 | 13   | 12   | 2   | LIANTANFAIYQTLGILIFVSCF  | L                                                                                  |
| SS50377_18016 | CRMP-2 | 26.9 | 13   | 10   | 2   | VAGIVIAIIIVIGGIGGGVFWYI  | KKSKTQLKNVQGGEVMQE                                                                 |
| SS50377_18080 | CRMP-2 | 56.5 | 13   | 26   | 0   | IIGIVVGIIAVVIGVIGGVYAV   | QMKKSNLVQKNSNVKPNKQNVYQRIDESATILGKAQ                                               |
| SS50377_18676 | CRMP-2 | 32.7 | 13   | 4    | 5   | YGILLGAGAGVLVTAGLLIYFIR  | NSTFGYKRVTGE                                                                       |
| SS50377_10698 | CRMP-2 | 27.7 | 12   | 8    | 2   | AIGVIFTLVVLTGsvGAILYAIL  | KKRnkaAVAVDTATN                                                                    |
| SS50377_fx024 | CRMP-2 | 20.2 | 12   | 6    | 1   | ALIIIFLSLEVIWGLGMVSYFGA  | KRLITIRDVKAQIQAQSDTKNE                                                             |
| SS50377_13205 | CRMP-2 | 27.1 | 12   | 10   | 1   | TITNTEFVFLALTAVVVAIVFL   | SMKHhRAQRQRAERIQNHtFQLSNKLANTSFGWG                                                 |
| SS50377_14554 | CRMP-2 | 31.7 | 12   | 8    | 2   | VAGIVVVVIAISGGISGGIFWYL  | KKSKTYMKNVDQVGIRQE                                                                 |
| SS50377_14603 | CRMP-2 | 32.7 | 12   | 13   | 2   | WIIGISVTGCLLLCTLIVGLIVG  | LSEGANRNIREsDE                                                                     |
| SS50377_15512 | CRMP-2 | 36.6 | 12   | 11   | 2   | GIITGIVITIIIVVTGVAATITY  | QIIrKLKK                                                                           |
| SS50377_15515 | CRMP-2 | 52.2 | 12   | 8    | 7   | LFAMLIVIALSLVAIMSIGFYLF  | ARKYLikhtYSITDNQIESEDkYNPELIIshQVACLNSGDSV                                         |
| SS50377_15940 | CRMP-2 | 36.5 | 12   | 13   | 0   | TIGAVLGGVVALTAVIGVVAFAV  | RSRKPRMHTeLTLVQRNEI                                                                |
| SS50377_15950 | CRMP-2 | 30.1 | 12   | 10   | 2   | AIAGITIAVVIVVGVVCGTFLF   | MKKKVYNVAVEIRNNLK                                                                  |
| SS50377_17132 | CRMP-2 | 30.7 | 12   | 9    | 2   | GAIIAIIAVVAIIAVCVILGCGF  | AAKAYRKRQKSikDGAERCGAERSETGVEAAVHIA                                                |
| SS50377_17543 | CRMP-2 | 48.8 | 12   | 16   | 2   | TIGFLLCFLISLVGAGIIITLYW  | QQRREkYYkLENYIIDQNFNTKSRFQLANNSKVVQLKNRQEKILQGNENQIENMLETPALSGEI<br>QIDLSDNTINDKVQ |
| SS50377_17954 | CRMP-2 | 48.9 | 12   | 16   | 2   | IIGFFICLLILIIAATIIFLFW   | KQKRNIYYKIENYgKEEDISTKDRFQFVNASKIFNKSQENFQPTKGMKKQLSFKFNKPETRDKT<br>TIDLtESVLPDNEE |
| SS50377_17982 | CRMP-2 | 33.4 | 12   | 10   | 2   | IAGITIAVVIVVGVVCGTFLFL   | KKKFYNVAVEIRNNLK                                                                   |
| SS50377_18070 | CRMP-2 | 17.1 | 12   | 4    | 2   | VAGILVAILVIVGAVGGGLAFYF  | IKK                                                                                |
| SS50377_18266 | CRMP-2 | 39.5 | 12   | 17   | 0   | IIGIVIAVILVAAGFAVFGVYLF  | KKYKQNKASTLIkDQVQAQIGSQYEV                                                         |
| SS50377_18273 | CRMP-2 | 38.2 | 12   | 16   | 0   | IIGIIIVIVVILAIVIITLYCW   | RKVIQNRVLPFENNEDLLNIDSQMEQ                                                         |
| SS50377_18685 | CRMP-2 | 33.6 | 12   | 9    | 2   | WVIALVIGIILIIICIGTIVFKI  | LHKRQKTKAGVvETNVIslSDQLTACFDQTEIPEKLV                                              |



| ID            | Group  | MW    | Cys% | CXXC | CXC | Transmembrane             | C-terminal sequence                                                                                                                                                      |
|---------------|--------|-------|------|------|-----|---------------------------|--------------------------------------------------------------------------------------------------------------------------------------------------------------------------|
| SS50377_18842 | CRMP-2 | 33.4  | 12   | 12   | 2   | LGGWVLTVFLEFGIIRIVGI IIL  | KLK LK                                                                                                                                                                   |
| SS50377_18905 | CRMP-2 | 27.1  | 12   | 12   | 0   | IVGVTIGLILGLVVLGVAVYFVW   | RNR IKNHHGLNKSNAVEHGMMLQVFREE                                                                                                                                            |
| SS50377_10896 | CRMP-2 | 23.0  | 11   | 6    | 1   | ITGIVIGSLFL LLLLILLI IYII | WRNRKQNQDEEGIIEECNGDPILLET K                                                                                                                                             |
| SS50377_12087 | CRMP-2 | 33.0  | 11   | 5    | 3   | GMVVAIVV LVAVAVFQVCAIAVY  | QLRQRGIPTRRNSILSSRTVVISQRTKSNDFQGLKMSDYAE                                                                                                                                |
| SS50377_12129 | CRMP-2 | 20.2  | 11   | 3    | 2   | HLYAAFQLAIP IFLFL LLLTIQA | LPCDPAQKRQKFTCRPSDCALCPFAACEYSPKRQKFACKCGNSSGKFCEICPENALFDAIFGCF<br>VAENCGRGRFNVRKGRCECDNGYGGKGCACSRGFEMVDLEGRQEGWACFESVRCEIGFRKVIS<br>GNQLVCELNACENGVVWGDFCVVGN         |
| SS50377_12863 | CRMP-2 | 33.0  | 11   | 5    | 3   | GMVVAIVV LVAVAVFQVCAIAVY  | QLRQRGIPTRRNSILSSRTVVISQRTKSNDFQGLKMSDYAE                                                                                                                                |
| SS50377_13234 | CRMP-2 | 26.6  | 11   | 6    | 1   | IVVMCVIILICLIGAAISCV      | EKRLQTAASSRKTIIYTQPWQDYE                                                                                                                                                 |
| SS50377_ee043 | CRMP-2 | 57.7  | 11   | 17   | 3   | VIVGIAVAVVVF IGLVVGVIIV   | CAVAKRREPAPIAPEIVITAD                                                                                                                                                    |
| SS50377_16519 | CRMP-2 | 19.6  | 11   | 2    | 2   | GSIIGLCVSVCIAGAI VGVVAY   | RVIKHKQGQKQKAETKTPLVGEGSAEKSQSA                                                                                                                                          |
| SS50377_ja068 | CRMP-2 | 32.2  | 11   | 10   | 1   | LIANTANFAIYQTLGIL I FVSCF | L                                                                                                                                                                        |
| SS50377_17287 | CRMP-2 | 79.3  | 11   | 18   | 4   | LLFVILVLLVFTWQIN FVLV     | RHQIIFIIFGCFYFYQLQQYLQYLQDNNTS QSYSDTNLKLTSTEQVVSFSRYFVEFSFVKQQ<br>LFVLR YRTRTWMIYIFTLPLQVSAHSHLPSCCSSYRLPIWINSTTRYRTSSCSCS GRWTSCS<br>RLLYIYYYQKRCPCPRPSSASQRHFPCCCLRSF |
| SS50377_17502 | CRMP-2 | 30.9  | 11   | 8    | 1   | GTIAGIVISALVVVGGWMTYYFI   | RTVRK                                                                                                                                                                    |
| SS50377_17783 | CRMP-2 | 18.1  | 11   | 6    | 0   | IGVISGVTTIATVVALGALCFLVW  | RELKRNRI LAVDAAGTRPGSLALD                                                                                                                                                |
| SS50377_17984 | CRMP-2 | 18.0  | 11   | 4    | 2   | VSGIMIAVLIVVGT VGGGLAYYF  | IKRANK                                                                                                                                                                   |
| SS50377_18065 | CRMP-2 | 18.1  | 11   | 6    | 1   | VAGIVIAVLV VIGGIGGVFWYL   | KKSKSQLKNV SQQEI MQE                                                                                                                                                     |
| SS50377_19026 | CRMP-2 | 22.2  | 11   | 3    | 3   | PIIATIIAII PFLFALSPCPNPF  | KKHQFTCKLNDCESKCNGGCRYDPVNHKFSVCVKIHFEGQYCECCEGYLYQSDTK -<br>DCELKSCVNGKYQNGKICKDNYSGDYCECCKGQIYQNKCILNIVCNEKQKQVFSGG -<br>QFSCQCNNGFTGNKCQKCEKGVVVDNICVQK               |
| SS50377_10026 | CRMP-2 | 13.3  | 10   | 2    | 1   | GIFGGCLILAVIIGVSVVICSII   | KKKQANADYLEVPLQADDVI                                                                                                                                                     |
| SS50377_10861 | CRMP-2 | 21.4  | 10   | 3    | 2   | AIAGIVIGVLALLALIFLIVFVA   | MRRKPTGPSKAKSSVTKDTVGGQRFI                                                                                                                                               |
| SS50377_10889 | CRMP-2 | 23.7  | 10   | 6    | 1   | AISGIVIGSL LLLLILLI IYI   | IWKNRKQKIEEEEIVQLNIA YQNDDSVLMDVK                                                                                                                                        |
| SS50377_11861 | CRMP-2 | 11.8  | 10   | 2    | 1   | ISGVILGCLLGIVILLITILVTV   | KISLRKRKSNHIRLV                                                                                                                                                          |
| SS50377_17485 | CRMP-2 | 13.3  | 10   | 4    | 1   | VLGISLAVKSVVLGASGGVFWYL   | RRAKIAKRKTVMKWRQQ                                                                                                                                                        |
| SS50377_10357 | CRMP-2 | 216.1 | 9    | 8    | 2   | IVIGFLVIFILCASGIYWLILILA  | KNRRNLIVSFVDYRVKGI IISKDDQQTSYSGFLSGTEDRIFELA                                                                                                                            |
| SS50377_10551 | CRMP-2 | 7.6   | 9    | 2    | 1   | YLSVFIAAAITLSIAIVLYQYRP   | QTD                                                                                                                                                                      |
| SS50377_11695 | CRMP-2 | 86.9  | 9    | 1    | 27  | IGVGTVVGVLCGVLI ALGVYFLV  | KKYQQRPKIAAKTDL PKVQKVKKAKAVKAFGRVQVSKPQME                                                                                                                               |
| SS50377_12210 | CRMP-2 | 17.9  | 9    | 3    | 0   | ISFAAVFTIYSFICFLCIIVIFR   | KQINGKINEKVISGVI AKPVLVQLL                                                                                                                                               |
| SS50377_12576 | CRMP-2 | 44.1  | 9    | 11   | 1   | IFFTHIIVDKKVFALILVVLIFL   | INLK                                                                                                                                                                     |
| SS50377_12824 | CRMP-2 | 23.0  | 9    | 4    | 2   | IVAVTILVIFVLHAIGITWYIV    | NKCYKNAVLSQGIKSA                                                                                                                                                         |
| SS50377_14197 | CRMP-2 | 14.2  | 9    | 3    | 1   | TGGIIGIVIAILVAVGVVGGVVG   | CCMRKKHTAVVADAETVVAGQQ                                                                                                                                                   |
| SS50377_14248 | CRMP-2 | 42.7  | 9    | 7    | 0   | LIISLCIIVVLAIV IAYSATFIL  | KKVRYNKLLKAALLAALSDEDKMVEEQAFDVNDYMTTVQEIPWEDEI                                                                                                                          |
| SS50377_16084 | CRMP-2 | 52.0  | 9    | 16   | 0   | IVGIVVGVVAAIGLVAGAGAYFI   | VKKRKQAVVSPPKDDEIKHANFQVLISSMENNKIYNDLYY                                                                                                                                 |

| ID            | Group  | MW    | Cys% | CXXC | CXC | Transmembrane           | C-terminal sequence                                                                                                                      |
|---------------|--------|-------|------|------|-----|-------------------------|------------------------------------------------------------------------------------------------------------------------------------------|
| SS50377_16112 | CRMP-2 | 20.2  | 9    | 1    | 2   | ALSVLVLYAVFTSLIAGLKCFML | GPAENQQSHSGRFSCWRPCSPRSSCLAPRRRSPEPSRRRAWCSTSRCSSWWSASTTPSWGARCRA<br>SPASRCSRATSSACRPCSPARQCQRARRPPPTRSPRFCWPSEGTSSTGCCRRSSARSQWRS<br>WC |
| SS50377_17858 | CRMP-2 | 39.2  | 9    | 6    | 6   | LIVSVSAGILAIILIIIVIVCLF | RKGILPIYRTKQVEARQKNVIQDQPQYQPIYPTVPTIPTFRNGQIIFTADMKVQV                                                                                  |
| SS50377_18255 | CRMP-2 | 10.9  | 9    | 3    | 0   | TLYIIIGVSIQVIFSVIAIISIF | CYFKKPKQGIENEPLLQEIDE                                                                                                                    |
| SS50377_12343 | CRMP-2 | 19.0  | 8    | 3    | 2   | IALWMLGIIISVQILILSYFVTV | KLVQMRKVKLQKLSNE                                                                                                                         |
| SS50377_12931 | CRMP-2 | 60.7  | 8    | 4    | 0   | VDGAVAIGVVLGLIGVIGALGNL | V                                                                                                                                        |
| SS50377_15458 | CRMP-2 | 15.2  | 8    | 3    | 1   | AGIIVSVIAGGAVGGGLAYYFI  | RKSKLAIARQ                                                                                                                               |
| SS50377_16922 | CRMP-2 | 38.0  | 8    | 4    | 3   | IVSTVVGIVLLLVAGAVVFCIW  | KAHAQKRDFLAAASPPLCTDQGMHI                                                                                                                |
| SS50377_16927 | CRMP-2 | 38.0  | 8    | 4    | 3   | IVSTVVGIVLLLVAGAVVFCIW  | KAHAQKRDFLAAASPPLCTDQGMHI                                                                                                                |
| SS50377_17449 | CRMP-2 | 11.0  | 8    | 2    | 3   | GTILLIVASISYSCCCCFACCC  | RKSVVQSKNPNANQAQYVMVSPLQEVDPATANNGEGLSSH                                                                                                 |
| SS50377_18252 | CRMP-2 | 11.5  | 8    | 3    | 0   | LIGILSAGVIAVIIAGIISF    | RLIQKKKADKERQPLVDAEQNELI                                                                                                                 |
| SS50377_18254 | CRMP-2 | 11.8  | 8    | 3    | 0   | IIGISMVGVFFLVIFIAAFVIV  | KSKKQSAASKLEKEPLLQEKQLEQQ                                                                                                                |
| SS50377_14538 | CRMP-2 | 16.2  | 7    | 2    | 1   | LSGGAVAGIVAVLVVYAQFEVA  | MYITSSRRRPRSEKYFHFSHQYLLLYGYI                                                                                                            |
| SS50377_14715 | CRMP-2 | 16.3  | 7    | 2    | 1   | LSGGAVAGIVAVLVVYAQFEVA  | LHITSSRRRPRSEKYFHFSHQYLLLYRYI                                                                                                            |
| SS50377_18243 | CRMP-2 | 13.7  | 7    | 3    | 0   | IIFIVAVTVLPLMFIVFSILFVI | KVIIELKDKTIKKDNEDLLLLTDKDSISAEAKIGEYAYNYD                                                                                                |
| SS50377_16266 | CRMP-2 | 113.2 | 6    | 4    | 6   | ATISVIFSLLAIGIAVFLIVFFV | RRARNKVKASRMTVTGKSVARYFVE                                                                                                                |
| SS50377_16420 | CRMP-2 | 27.3  | 6    | 3    | 1   | IAGIIVGSIIVIGIAGVTVCYFL | KRKSRAQNTQAVKDTTMDTIFGGQTVMRSQ                                                                                                           |
| SS50377_13382 | CRMP-2 | 56.8  | 5    | 4    | 2   | LSFFVLILIFIVVLMFFVFLF   | RTKMPKFLTHKPDNRVHNDGGLNENGGKGVSLNVILEQASQMQQ                                                                                             |
| SS50377_18863 | CRMP-2 | 29.3  | 5    | 2    | 1   | IAPTTLAIGVTIACFVTSLVTVY | FPHYRKELYVSFAVAPTCMRALCRYNRKQQEVVYQGSPNYWGSRLGRREIPAIHFTGII                                                                              |
| SS50377_16923 | CRP    | 7.9   | 36   | 9    | 13  |                         |                                                                                                                                          |
| SS50377_19119 | CRP    | 8.4   | 21   | 5    | 3   |                         |                                                                                                                                          |
| SS50377_14551 | CRP    | 10.9  | 18   | 9    | 0   |                         |                                                                                                                                          |
| SS50377_17375 | CRP    | 45.0  | 18   | 31   | 3   |                         |                                                                                                                                          |
| SS50377_13213 | CRP    | 22.9  | 17   | 10   | 2   |                         |                                                                                                                                          |
| SS50377_13251 | CRP    | 17.5  | 17   | 9    | 1   |                         |                                                                                                                                          |
| SS50377_16087 | CRP    | 20.3  | 17   | 15   | 0   |                         |                                                                                                                                          |
| SS50377_16885 | CRP    | 47.9  | 17   | 33   | 3   |                         |                                                                                                                                          |
| SS50377_17177 | CRP    | 20.8  | 17   | 9    | 2   |                         |                                                                                                                                          |
| SS50377_17382 | CRP    | 55.8  | 17   | 32   | 5   |                         |                                                                                                                                          |
| SS50377_17481 | CRP    | 23.2  | 17   | 16   | 1   |                         |                                                                                                                                          |
| SS50377_12851 | CRP    | 13.7  | 16   | 6    | 1   |                         |                                                                                                                                          |
| SS50377_13211 | CRP    | 13.7  | 16   | 6    | 1   |                         |                                                                                                                                          |
| SS50377_14678 | CRP    | 61.1  | 16   | 37   | 4   |                         |                                                                                                                                          |

| ID            | Group | MW    | Cys% | CXXC | CXC | Transmembrane | C-terminal sequence |
|---------------|-------|-------|------|------|-----|---------------|---------------------|
| SS50377_15973 | CRP   | 65.7  | 16   | 24   | 8   |               |                     |
| SS50377_17745 | CRP   | 12.2  | 16   | 6    | 1   |               |                     |
| SS50377_12057 | CRP   | 31.0  | 15   | 11   | 3   |               |                     |
| SS50377_13273 | CRP   | 82.5  | 15   | 30   | 10  |               |                     |
| SS50377_18958 | CRP   | 6.5   | 15   | 2    | 1   |               |                     |
| SS50377_ja002 | CRP   | 6.4   | 15   | 2    | 1   |               |                     |
| SS50377_12056 | CRP   | 44.7  | 14   | 12   | 4   |               |                     |
| SS50377_12545 | CRP   | 59.2  | 14   | 31   | 0   |               |                     |
| SS50377_16021 | CRP   | 13.7  | 14   | 2    | 2   |               |                     |
| SS50377_16108 | CRP   | 133.6 | 14   | 44   | 13  |               |                     |
| SS50377_10550 | CRP   | 6.6   | 13   | 1    | 0   | 1*            |                     |
| SS50377_10705 | CRP   | 47.9  | 13   | 15   | 3   |               |                     |
| SS50377_14913 | CRP   | 58.3  | 13   | 18   | 2   |               |                     |
| SS50377_16132 | CRP   | 7.9   | 13   | 4    | 1   |               |                     |
| SS50377_18098 | CRP   | 24.3  | 13   | 8    | 2   |               |                     |
| SS50377_18843 | CRP   | 34.4  | 13   | 12   | 2   |               |                     |
| SS50377_ja001 | CRP   | 30.5  | 13   | 15   | 0   |               |                     |
| SS50377_jh039 | CRP   | 19.5  | 12   | 6    | 0   |               |                     |
| SS50377_10836 | CRP   | 11.4  | 12   | 1    | 0   | 1*            |                     |
| SS50377_13236 | CRP   | 36.9  | 12   | 13   | 1   |               |                     |
| SS50377_jh077 | CRP   | 19.6  | 12   | 6    | 0   |               |                     |
| SS50377_15348 | CRP   | 8.4   | 12   | 1    | 1   |               |                     |
| SS50377_15470 | CRP   | 12.7  | 12   | 3    | 1   |               |                     |
| SS50377_fx068 | CRP   | 12.0  | 11   | 3    | 2   |               |                     |
| SS50377_13111 | CRP   | 9.2   | 11   | 1    | 2   |               |                     |
| SS50377_ee044 | CRP   | 12.0  | 11   | 3    | 2   |               |                     |
| SS50377_14002 | CRP   | 21.1  | 11   | 8    | 0   |               |                     |
| SS50377_14257 | CRP   | 16.3  | 11   | 3    | 1   |               |                     |
| SS50377_14704 | CRP   | 38.9  | 11   | 13   | 1   |               |                     |
| SS50377_14837 | CRP   | 6.2   | 11   | 1    | 0   |               |                     |
| SS50377_15373 | CRP   | 53.4  | 11   | 15   | 1   |               |                     |
| SS50377_15972 | CRP   | 27.0  | 11   | 6    | 2   |               |                     |
| SS50377_18295 | CRP   | 18.0  | 11   | 6    | 0   |               |                     |
| SS50377_18560 | CRP   | 11.7  | 11   | 4    | 1   |               |                     |

| <b>ID</b>     | <b>Group</b> | <b>MW</b> | <b>Cys%</b> | <b>CXXC</b> | <b>CXC</b> | <b>Transmembrane</b> | <b>C-terminal sequence</b> |
|---------------|--------------|-----------|-------------|-------------|------------|----------------------|----------------------------|
| SS50377_13471 | CRP          | 16.2      | 10          | 4           | 2          |                      |                            |
| SS50377_15383 | CRP          | 19.2      | 10          | 3           | 2          |                      |                            |
| SS50377_18516 | CRP          | 6.8       | 10          | 2           | 0          |                      |                            |
| SS50377_18721 | CRP          | 19.2      | 10          | 3           | 2          |                      |                            |

\*) These proteins have a single TM domain but are classified as CRP because they do not fulfill the CRMP-2 criteria for CXC and CXXC.
