# Supplementary material for: The Genome of Spironucleus salmonicida Highlights a Fish Pathogen Adapted to Fluctuating Environments
Source: PubMed Central journal article supplement (PMC3916229; doi:10.1371/journal.pgen.1004053), 2014-02-06
Supplement: pgen.1004053.s015.pdf [file pgen.1004053.s015.pdf]

**Table S5 Identified transporter families in *G. intestinalis* and *S. salmonicida*.**

| <b>Family</b> | <b>Short Name</b> | <b>Name</b>                                                                              | <b>SS</b> | <b>GI</b> |
|---------------|-------------------|------------------------------------------------------------------------------------------|-----------|-----------|
| 2.A.1         | MFS               | Major Facilitator Superfamily                                                            | 46        | 17        |
| 3.A.1         | ABC               | ATP-binding Cassette Superfamily                                                         | 21        | 26        |
| 2.A.18        | AAAP              | Amino Acid/Auxin Permease Family                                                         | 28        | 11        |
| 9.B.37        | HIP14             | Huntington-interacting Protein 14 Family                                                 | 20        | 9         |
| 2.A.7         | DMT               | Drug/Metabolite Transporter Superfamily                                                  | 14        | 8         |
| 3.A.3         | P-ATPase          | P-type ATPase Superfamily                                                                | 8         | 13        |
| 2.A.66        | MOP               | Multidrug/Oligosaccharidyl-lipid/Polysaccharide Flippase Superfamily                     | 10        | 9         |
| 3.A.2         | F-ATPase          | H <sup>+</sup> - or Na <sup>+</sup> -translocating F-type, V-type and A-type Superfamily | 5         | 4         |
| 2.A.57        | ENT               | Equilibrative Nucleoside Transporter Family                                              | 7         | 1         |
| 2.A.43        | LCT               | Lysosomal Cystine Transporter Family                                                     | 5         | 2         |
| 1.B.12        | AT-1              | Autotransporter-1 Family                                                                 | 3         | 3         |
| 2.A.5         | Zn2+              | Zinc (Zn <sup>2+</sup> )-Iron (Fe <sup>2+</sup> ) Permease (ZIP) Family                  | 5         | 1         |
| 2.A.4         | CDF               | Cation Diffusion Facilitator Family                                                      | 3         | 2         |
| 1.A.1         | VIC               | Voltage-gated Ion Channel Superfamily                                                    | 4         | 1         |
| 8.A.28        | Ankyrin           | Ankyrin Family                                                                           | 1         | 4         |
| 3.A.16        | ER-RT             | Endoplasmic Reticular Retrotranslocon Family                                             | 2         | 2         |
| 1.A.35        | MIT               | CorA Metal Ion Transporter Family                                                        | 2         | 2         |
| 5.A.1         | DsbD              | Disulfide Bond Oxidoreductase D Family                                                   | 2         | 2         |
| 2.A.92        | CTL               | Choline Transporter-like Family                                                          | 4         | 0         |
| 8.A.27        | PLI-              | Phospholipid Importer -subunit Family                                                    | 2         | 1         |
| 2.A.36        | CPA1              | Monovalent Cation:Proton Antiporter-1 Family                                             | 2         | 1         |
| 9.A.54        | B12               | Lysosomal Cobalamin (B12) Transporter Family                                             | 1         | 2         |
| 9.A.40        | HCC               | HlyC/CorC Family                                                                         | 2         | 1         |
| 2.A.69        | AEC               | Auxin Efflux Carrier Family                                                              | 2         | 1         |
| 3.A.5         | Sec               | General Secretory Pathway Family                                                         | 2         | 1         |
| 4.C.1         | FAT               | Proposed Fatty Acid Transporter Family                                                   | 3         | 0         |
| 9.B.30        | Hly III           | Hly III Family                                                                           | 3         | 0         |
| 2.A.3         | APC               | Amino Acid-Polyamine-Organocation Family                                                 | 1         | 1         |
| 3.A.20        | PPI               | Peroxisomal Protein Importer Family                                                      | 2         | 0         |
| 9.B.142       | gt39              | integral membrane glycosyltransferase family 39 family                                   | 1         | 1         |
| 8.A.21        | Stomatin          | Stomatin/Podocin/Band 7/Nephrosis.2/SPFH Family                                          | 2         | 0         |
| 8.A.30        | Nedd4             | Nedd4-Family Interacting Protein-2 Family                                                | 2         | 0         |
| 9.B.82        | Rer1              | Endoplasmic Reticulum Retrieval Protein1 (Putative Heavy Metal Transporter) Family       | 1         | 1         |
| 2.A.94        | Pho1              | Phosphate Permease Family                                                                | 1         | 1         |
| 1.A.54        | Presenilin        | Presenilin ER Ca <sup>2+</sup> Leak Channel Family                                       | 0         | 1         |
| 1.A.17        | Ca-CIC            | Calcium-Dependent Chloride Channel Family                                                | 0         | 1         |
| 3.A.18        | mRNA-E            | Nuclear mRNA Exporter Family                                                             | 0         | 1         |
| 9.B.1         | MHP               | Metal Homeostasis Protein Family                                                         | 0         | 1         |
| 2.A.48        | RFC               | Reduced Folate Carrier Family                                                            | 0         | 1         |
| 1.A.33        | Hsp70             | Cation Channel-forming Heat Shock Protein-70 Family                                      | 0         | 1         |
| 9.A.6         | ATP-E             | ATP Exporter Family                                                                      | 0         | 1         |
| 2.A.2         | GPH               | Glycoside-Pentoside-Hexuronide:Cation Symporter Family                                   | 1         | 0         |
| 2.A.12        | AAA               | ATP:ADP Antiporter Family                                                                | 0         | 1         |
| 9.B.77        | Meckelin          | Meckel Syndrome Protein Family                                                           | 1         | 0         |
| 3.D.1         | NDH               | H <sup>+</sup> or Na <sup>+</sup> -translocating NADH Dehydrogenase Family               | 0         | 1         |
| 9.A.45        | MagT1             | Magnesium Transporter1 Family                                                            | 0         | 1         |
